# Supplementary material
Source: PubMed Central journal article supplement (PMC8418904)
Supplement: NIHMS1716172-supplement-Supplementary_Material.pdf [file NIHMS1716172-supplement-Supplementary_Material.pdf]

# **Molecular Classification and Therapeutic Targets in Extrahepatic Cholangiocarcinoma**

## **Authors:**

Robert Montal, Daniela Sia, Carla Montironi, Wei Q. Leow, Roger Esteban-Fabré, Roser Pinyol, Miguel Torres-Martin, Laia Bassaganyas, Agrin Moeini, Judit Peix, Laia Cabellos, Miho Maeda, Carlos Villacorta-Martin, Parissa Tabrizian, Leonardo Rodriguez-Carunchio, Giancarlo Castellano, Christine Sempoux, Beatriz Minguez, Timothy M. Pawlik, Ismail Labgaa, Lewis R. Roberts, Manel Sole, Maria I. Fiel, Swan Thung, Josep Fuster, Sasan Roayaie, Augusto Villanueva, Myron Schwartz, Josep M. Llovet.

## **Supplementary Material Contents:**

**Supplementary Methods:** Pages 2-10.

**Supplementary Figures:** 20; pages 11-31.

**Supplementary Tables:** 15; pages 32-57.

**References:** Pages 58-63.

## **Supplementary Methods**

### **Pathological characterization**

Further pathological characterization of tumors in terms of histological type, cell differentiation, perineural invasion, vascular invasion, precursor lesions, growth pattern, tumor purity, presence of fibrotic tissue (0 = none; 1 = mild; 2 = moderate; 3 = marked) and presence of lymphocyte infiltration (0 = absence; 1 = minimal; 2 = mild; 3 = moderate; 4 = severe; samples with staining between 0 and 2 were considered with low immune infiltration whereas 3 and 4 scores were classified as high immune infiltration) was conducted by 2 independent liver pathologists (W.Q.L. and C.M.) ([Table 1](#), [Table S1](#)).

### **RNA and DNA isolation**

Tumoral tissue sections were macro-dissected to avoid contamination of non-cancerous tissue. Total RNA was isolated from three freshly cut 5µm-thick FFPE sections using QIAcube (Qiagen). RNA quantity was assessed using Quant-iT Ribogreen RNA assay kit (Invitrogen). RNA quality was checked by real-time quantitative reverse transcription PCR (qRT-PCR) of RPL13A (cut-off Ct<28 cycles). Genomic DNA was isolated from seven freshly cut 5µm-thick FFPE sections using QIAcube (Qiagen). DNA quantity was assessed using a Quant-It PicoGreen dsDNA Assay kit (Invitrogen). To determine DNA quality, we used qRT-PCR of RNase P (Applied Biosystems).

## Whole-genome expression

### *Unsupervised clustering*

Principal Component Analysis (PCA) was initially conducted in the whole eCCA cohort using the `prcomp` function from the R package `stats` v3.6.2 in order to obtain the distribution of samples depending on two principal components (Fig. S19). pCCA and dCCA were not differentially distributed in the plot, indicating that it was reasonable to group together these two anatomical locations of eCCA for the transcriptome-based molecular clustering.

Non-negative matrix factorization (NMF) from NMFConsensus module in GenePattern[1] was employed to identify stable gene expression clusters. NMF parameters:  $k = 1$  to  $k = 5$  clusters; number of clusterings to build consensus matrix = 20; number of iterations = 2000; error function = Euclidean. In order to remove noise, the top 1696 most variable genes, identified with the Preprocess Dataset module in GenePattern[1], were used as input[2]. The preferred clustering result was determined using the observed cophenetic correlation, which measures the stability based on distances between clusters (Fig. 2A). Previous studies showed that transcriptome-based clustering was consistent independently of the exclusion of low purity samples[2]. No batch effect was observed between center of origin and molecular classes (Fig. 3A).

One of the molecular classes obtained with unsupervised clustering presented overexpression of classic hepatocyte markers such as albumin, transferrin and *CYP3A4* (Fig. 2F). A similar finding was observed during the molecular classification of CCA conducted in the TCGA project[3]. However, they considered this expression profile as a

result of contamination by even a small amount of non-tumoral liver. To exclude that a potential hepatic contamination could be the determinant of this biological traits, we assessed hematoxylin and eosin slides to quantify the percentage of non-tumoral liver in our macro-dissected samples (Fig. S6A). Of the 182 samples with available transcriptome, 62 (34%) had >1% [range 1-40%] non-tumoral liver inside the macro-dissected area, without a significant association with any molecular class despite a trend was observed in the Metabolic. Next, we repeated the unsupervised clustering in the eCCA cohort including only those samples without any non-tumoral liver in the slide (in and out the macro-dissected area) to grant exclusion of any potential hepatic contamination (n=93) (Fig. S6B). The four molecular classes obtained paralleled the ones obtained with the whole eCCA cohort. Specifically, 68% of the hallmarks defining each molecular class persisted significant even with a lower statistical power. Furthermore, to minimize the impact of non-tumoral liver expression from the transcriptome, we filtered out 386 liver-specific genes derived from the GTEx normal tissue expression database as was done in the TCGA study[3] (Fig. S6C). Unsupervised clustering in four molecular classes obtained an almost perfect overlap with the previously proposed classes (99% of the samples fell into the same class when these genes were subtracted). Finally, to determine a specific subset of genes particularly defining non-tumoral liver expression in our dataset we applied NMF to perform virtual microdissection of gene expression data as previously described[4]. A liver-related expression factor comprising 149 genes (Table S14) was unveiled by computing overlaps of selected genes with curated gene sets from MSigDB collections[5] (Table S15). Again, unsupervised clustering excluding these 149

genes obtained an almost perfect overlap with the previously proposed classes (97% of the samples fell into the same class) (Fig. S6D).

### *Gene Set Enrichment Analysis*

Hallmark gene sets[5] from MSigDB collections, representing 50 well-defined biological states or processes collections, were evaluated using single-sample Gene Set Enrichment Analysis (ssGSEA) Projection from GenePattern[1]. Each enrichment score represents the degree of which the genes in a particular gene set are coordinately up- or down-regulated within a sample (Fig. 2B).

Virtual microdissection of tumor-microenvironment using gene expression data was conducted using the Estimation of STromal and Immune cells in MAlignant Tumors (ESTIMATE) package[6]. This method based on ssGSEA algorithm allows the calculation of the stromal and immune compartment in tumoral tissue (Fig. 2D-E).

The same ssGSEA tool and the Pan-cancer Immune Metagenes described in The Cancer Immunome Atlas[7] were used to estimate the infiltration in the tumors of 28 immune subpopulations including TILs as well as cell types related to innate immunity (Fig. 2C).

The Tumor Immune Dysfunction and Exclusion (TIDE) transcriptome-based algorithm[8] was applied to quantify dysfunction and exclusion of infiltrating cytotoxic T lymphocytes (Fig. S13).

### *Upstream transcriptional regulators*

Genes differentially expressed between molecular classes (FDR<0.01) were identified with the Comparative Marker Selection module from GenePattern[1]. Ingenuity Pathway analysis software (Qiagen) was used for the inference of putative upstream regulators explaining the observed gene expression changes among the identified molecular classes (Table S8).

### *Molecular class prediction*

Prediction in the eCCA cohort of previously reported mRNA-based molecular classes of CCA[9–11], hepatocellular carcinoma[12–14] and pancreatic adenocarcinoma[4,15] was performed using the Nearest Template Prediction method, as implemented in the specific module of GenePattern[1] (Fig. 3A). In addition, the similarity between transcriptome profiles of two independent data sets was analyzed with the SubMap module from GenePattern[1] (Fig. 3F-G).

### *Gene expression signature design*

The Class Neighbors tool from GenePattern[1] was used to determine based on a signal-to-noise distance function which genes were most closely correlated with a specific molecular class template and how significant the correlation was compared with random permutation versions of the phenotype (intersection of observed data with 1% significance level)[16]. The selection of up to 25, 50, 75 and 100 genes per class for the construction of the gene expression signature seemed likely to be large enough to be robust against noise and small enough to be applied in a clinical setting (Fig. S14). The accuracy of

gene-expression signatures was tested on the discovery data set using the Nearest Template Prediction method.

## **Targeted DNA-sequencing**

### *Mutation calling and interpretation*

All sequenced genes had homogenous mean coverage allowing an unbiased interpretation of structural genomic aberrations (Fig. S20). Cancer-specific variant calling was performed with SNPPEP algorithm (Agilent) and the following criteria: Variant score threshold = 0.3, minimum quality for base = 30, variant call quality threshold = 100, minimum allele frequency = 0.01, minimum number of reads supporting variant allele = 10.

Interpretation of variants was conducted by Cancer Genome Interpreter[17], a software that relies on existing knowledge collected from several resources (DoCM, ClinVar, OncoKB and IARC) and on a computational method that estimates the oncogenic effect of variants of uncertainty significance (OncodriveMUT). Candidate mutations were considered to be the ones already known to be oncogenic as well as the predicted drivers in Tier 1. Variants with an allele frequency lower than 5% were ultimately excluded in order to enrich the potential biological and clinical impact of results (Table S3). Accurate interpretation of PMS2 and KMT2C mutations was not feasible due to the interferences of pseudogenes (highly homologous sequences)[18]. The packages maftools and PathwayMapper were used for visualizing the data.

### *Copy number analysis*

In order to detect copy number variations (CNV) from the targeted DNA-sequencing panel, we used the multifactor normalization tool ONCOCNV[19] version 6.9, designed specifically for CNV analysis of amplicon panels. A total of 15 matched non-neoplastic bile ducts were used for normalization, and 150 tumors were evaluated. Focal amplifications were called at segments with  $\geq 6$  copies and homozygous deletions at segments with 0 copies[20] (Table S4).

### **Immunohistochemistry**

HER2 evaluation was done according to the recommendations for its testing in breast cancer[21], being positive when IHC was 3+ (circumferential membrane staining that is complete, intense, and within > 10% of tumor cells). PD-1 positivity was defined by an unequivocal cytoplasmic staining of lymphocytes in >5% over the total number of intra-tumoral lymphocytes[22]. PD-L1 positive samples were defined by unequivocal membranous staining of tumor cells or stromal cells in >1% over the total number of cells[23]. For  $\alpha$ -SMA evaluation, the intensity of the staining in vascular smooth muscle cells was used as the reference staining value.  $\alpha$ -SMA staining in tumor fibroblasts was qualitatively classified into 4 groups (0 = absence; 1 = much lower intensity; 2 = slightly lower intensity; 3 = equal intensity)[24]. Positive  $\alpha$ -SMA was defined by  $\geq 2$  intensity in >50% of fibroblasts. Tumor testing for DNA MMR deficiency with immunohistochemistry for MMR proteins was conducted as recommended for screening of Lynch syndrome in hereditary nonpolyposis colorectal cancer[25]. Hep Par 1 and CK19 staining was qualitatively classified into 3 groups (0 = absence; 1 = low intensity; 2 = high intensity).



Positive Hep Par 1 and CK19 was defined by any positive intensity in >10% of tumoral cells. Ki67 percentage evaluation was determined in tumoral cells as previously described in breast cancer[26].

### **In situ hybridization**

FISH testing was performed on serially cut 3µm paraffin-embedded tissue sections to validate ERBB2 amplifications identified by DNA-targeted exome sequencing (Fig. S4). One slide was stained with H&E and reviewed by a pathologist to identify areas of tumor. The *HER2* genetic testing was performed using the XL ERBB2 (HER2/NEU) amp probe (D-6010-100-OG, Metasystems, Altlußheim, Germany) according to the manufacturer's instructions. Samples were analyzed independently by two evaluators using the platform slide scanning system Metafer version 3.5 (MetaSystems) combined with image analysis (MetaSystems). At least 20 neoplastic cells were examined for each sample. Amplification of *HER2* was defined when the average copy number ratio, *HER2/CEN17* was  $\geq 2.0$  or when the average of *HER2* signals per nuclei was  $\geq 6$ .

### **ICGC and TCGA RNAseq analysis**

Regarding BTC-ICGC, in order to remove biases in downstream analysis caused by differences in sequencing depth, we computed sample normalization factors using edgeR[27] and scaled the library sizes accordingly. Specifically, we used the trimmed mean of M values (TMM method) for estimating the library size before scaling and then normalized by transcript length too, resulting in the RPKM matrix. One sample (BD20) was not successfully normalized. Data from HCC-TCGA and PDAC-TCGA were already normalized when downloaded at <https://www.cbioportal.org>. Prediction in the external

cohort of the eCCA classifier was performed using the Nearest Template Prediction method, as implemented in the specific module of GenePattern[1] (Fig. 4A, Fig. S16).

### **TIGER-LC metabolomics analysis**

To better delineate metabolites defining the eCCA Metabolic class, we used gene expression data deposited in the NCBI GEO under accession code GSE76297 to infer hepatobiliary tumors (HCC and iCCA) from the TIGER-LC Consortium[28] recapitulating the proposed eCCA classes. Prediction in the external cohort of the eCCA classifier was performed using the Nearest Template Prediction method, as implemented in the specific module of GenePattern[1]. Metabolome data was obtained in 140 samples from Metabolon's Discover HD4 Platform (718 metabolites). Metabolite Set Enrichment Analysis from MetaboAnalyst 4.0[29] was used to identify biologically meaningful patterns defined by the eCCA Metabolic class (Fig. S17).

### **Ongoing clinical trials**

Data of ongoing clinical trials was obtained in March 2019 from the ClinicalTrials.gov database. Keyword searches for “cholangiocarcinoma” and “biliary tract cancer” were used to identify active clinical trials (recruiting, not yet recruiting, active, not recruiting, enrolling by invitation) assessing targeted therapies for advanced eCCA. Basket trials assessing solid tumors other than hepato-biliary-pancreatic tumors were excluded (Table S13).

## Supplementary Figures

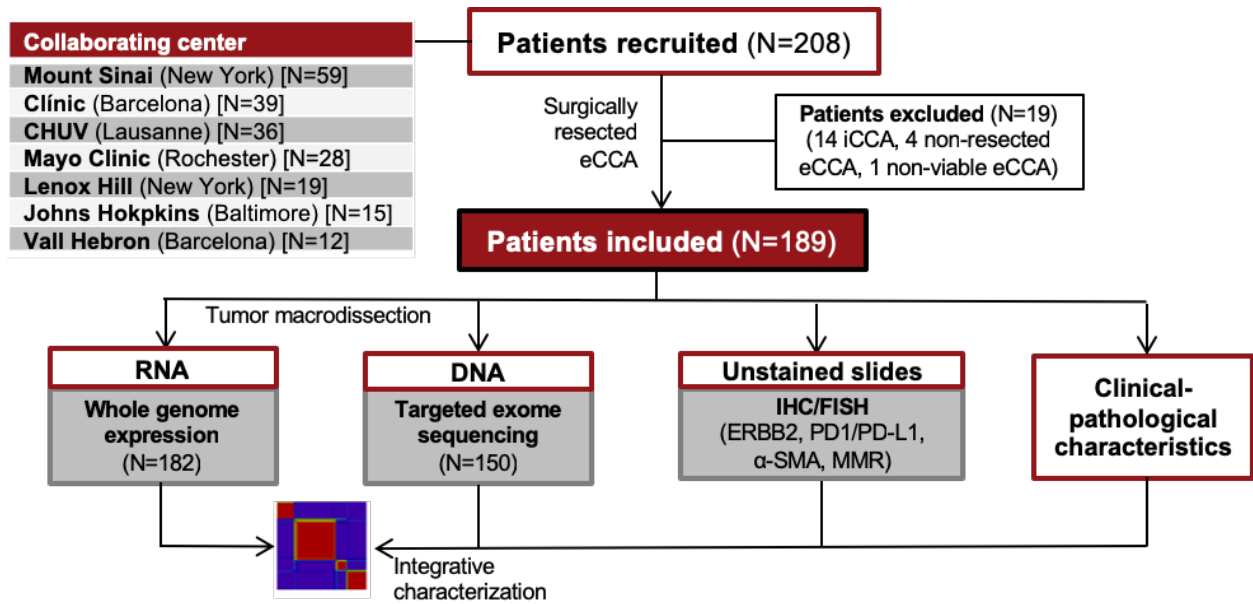

**Supplementary Fig. 1. Flow chart of the eCCA study.** Samples from surgically resected eCCA were collected from 7 international centers and analyzed using whole-genome expression, targeted DNA-sequencing and IHC/FISH.

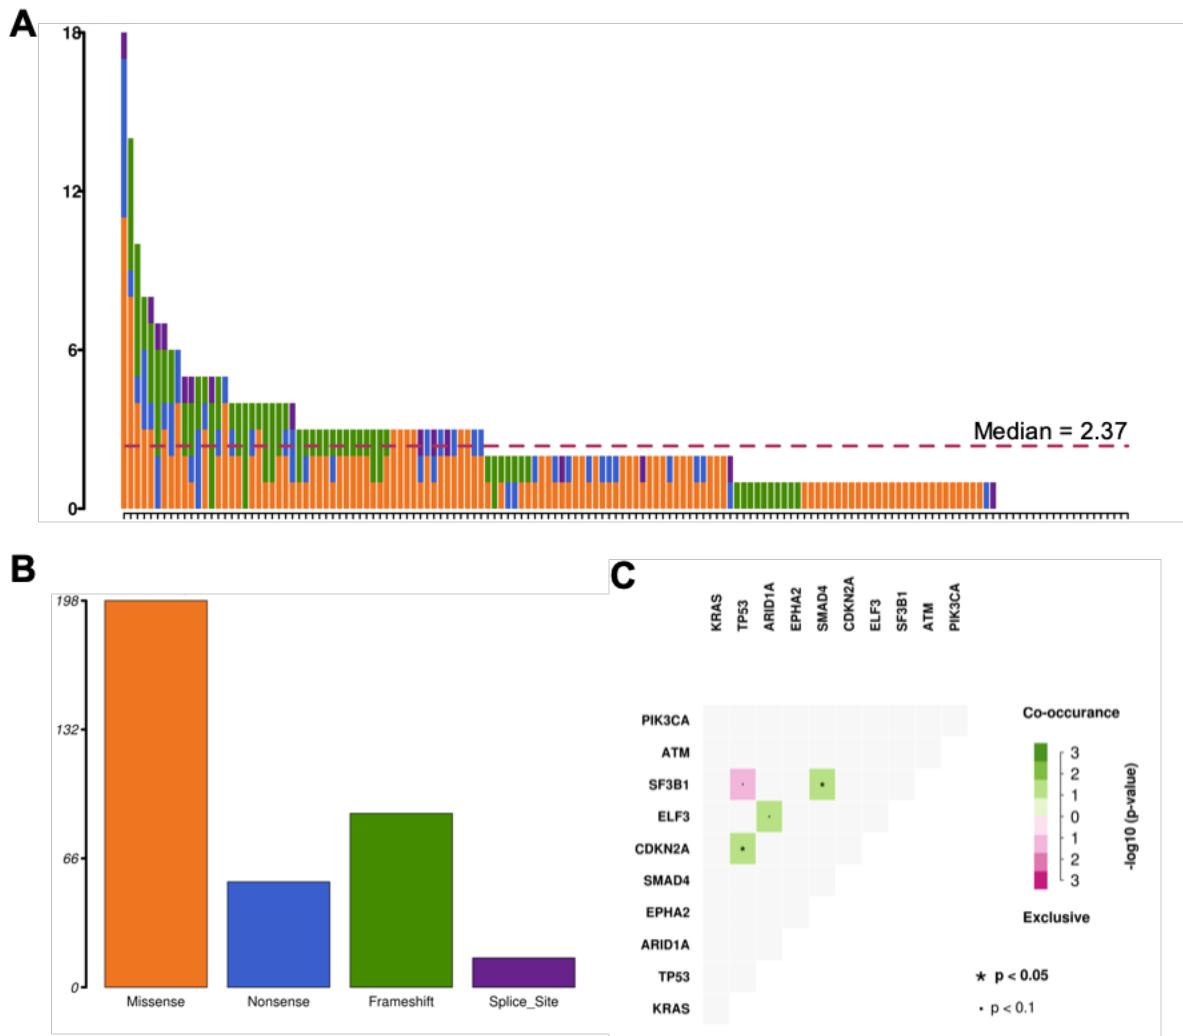

**Supplementary Fig. 2. Tumor mutational burden in eCCA. (A)**, Total number of mutations per eCCA sample ranked by their mutational burden (maximum = 18, minimum = 0, median = 2.37). Color of bars represents the type of structural genomic alteration: orange: missense; purple: nonsense; green: frameshift indel; blue: splice site. **(B)**, Prevalence of type of structural genomic alteration in the eCCA cohort. **c**, Top 10 most frequently mutated genes and their co-occurrence or mutually exclusivity. P values were calculated using a two-sided Fisher's exact test.

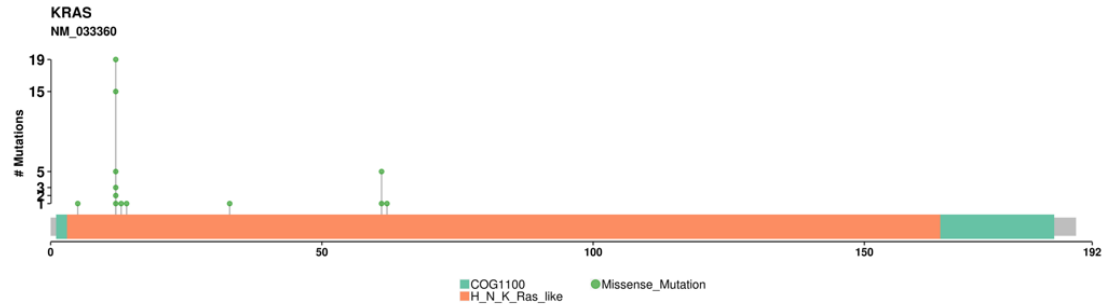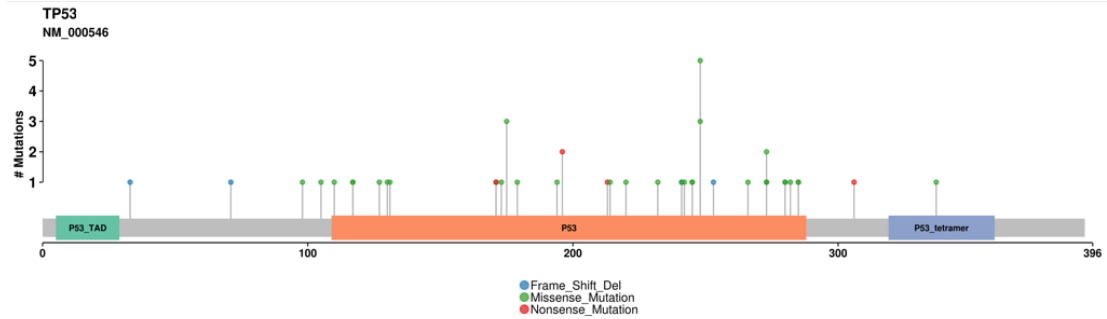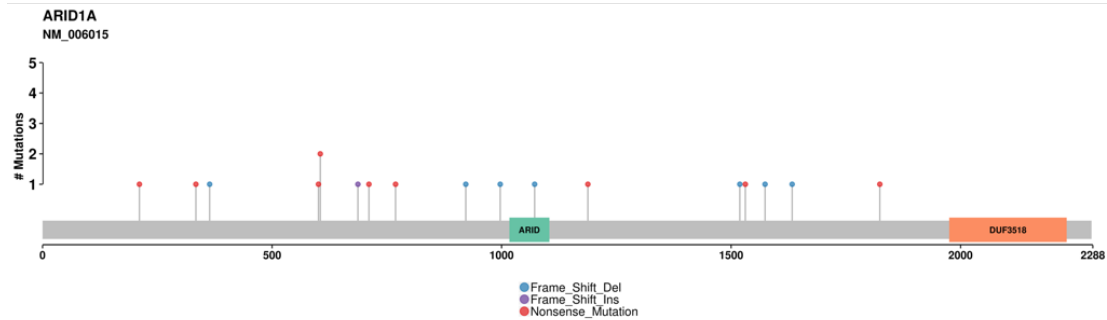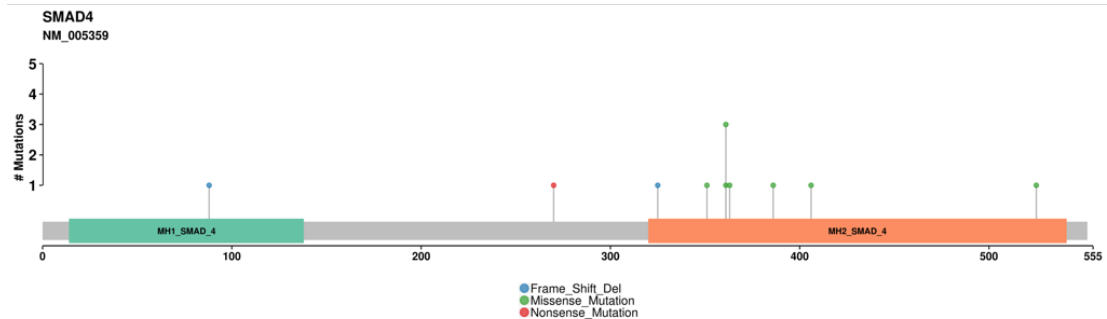

**Supplementary Fig. 3. Distribution of mutations in *KRAS*, *TP53*, *ARID1A* and *SMAD4*.** Mutation diagrams for the four most mutated genes in eCCA. Known or predicted driver mutations are visualized within the functional domains of the respective protein using maftools.

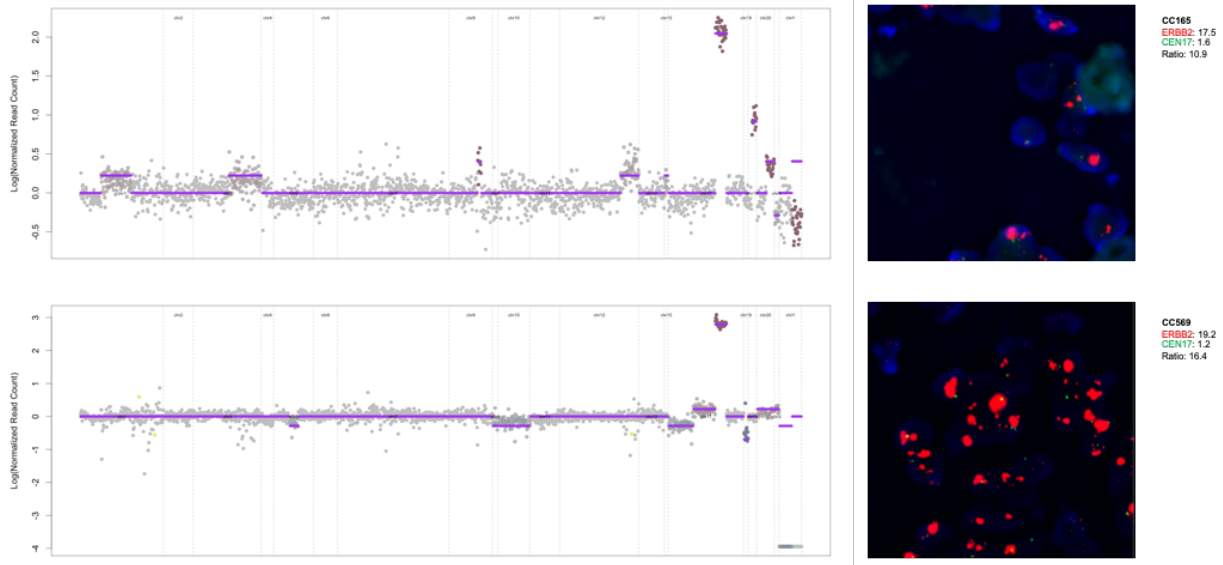

**Supplementary Fig. 4. *ERBB2* amplifications in eCCA by FISH.** Focal amplifications of *ERBB2* (segments with  $\geq 6$  copies) identified in two eCCA samples by targeted DNA-sequencing and subsequent validation by FISH.

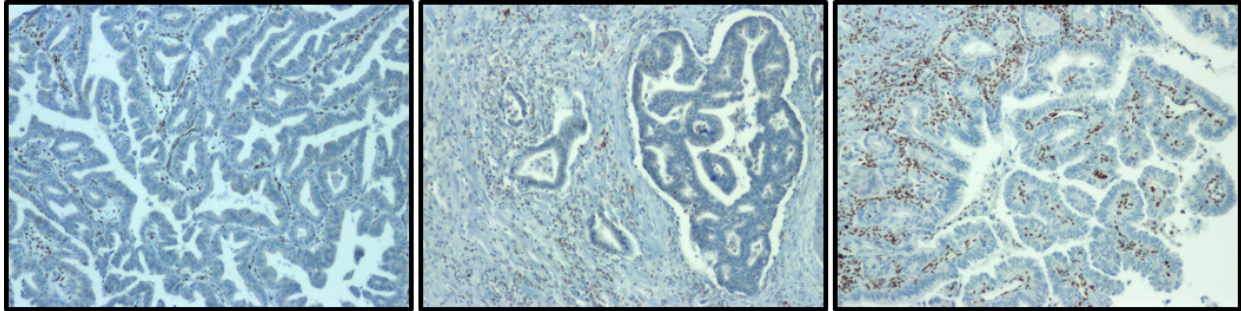

CC411. MSH2 mutation and loss of expression.

CC499. MSH2 mutation and loss of expression.

CC593. MSH6 mutation and loss of expression.

**Supplementary Fig. 5. MMR repair deficiency in eCCA.** Loss of expression of MMR proteins (*MSH2* and *MSH6*) by IHC in three of the four eCCA samples with available tissue and with the presence of mutations in the same gene detected by targeted DNA-sequencing.

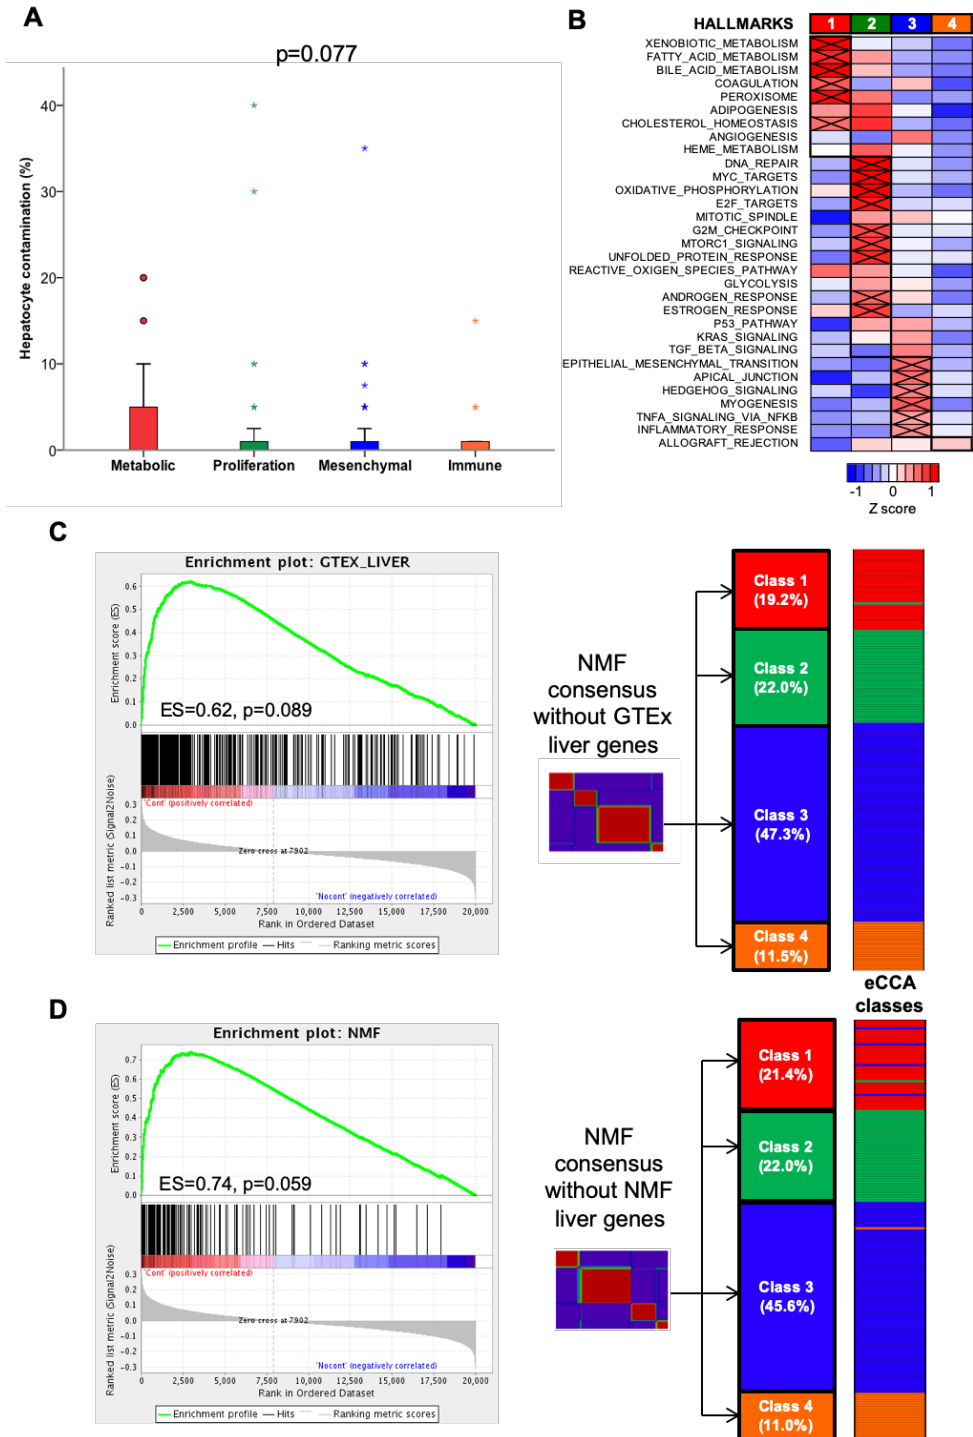

**Supplementary Fig. 6. Molecular eCCA classes and potential hepatic contamination.** (A), Percentage of non-tumoral liver contamination in macro-dissected samples assessed from hematoxylin and eosin slides. P value was calculated using



Kruskal-Wallis Test. **(B)**, Heatmap of hallmark gene sets from MSigDB collections in four molecular classes obtained from unsupervised clustering of eCCA samples without potential hepatic contamination (n=93). The four molecular classes resemble the proposed Metabolic, Proliferation, Mesenchymal and Immune classes obtained with the whole eCCA cohort ([Fig. 1b](#)). Single-sample Gene Set Enrichment Analysis (ssGSEA) was used to obtain the enrichment score, representing the degree of which the genes in a particular gene set are coordinately up- or down-regulated. Samples from the same molecular class were represented with a normalized enrichment score. P values between a specific molecular class and the rest were calculated using T-Test, being crossed cells lower than 0.05. **(C)**, Enrichment plot of 386 liver-specific genes derived from the GTEx normal tissue expression database[3] in eCCA samples with potential hepatic contamination and transcriptome-based unsupervised classification of eCCA filtering out these genes. The four molecular classes identified have an almost perfect overlap with the previously proposed clustering using the whole transcriptome: One Proliferation class tumor classified now as a Metabolic class. **(D)**, Enrichment plot of 149 liver genes identified by NMF in eCCA samples with potential hepatic contamination and transcriptome-based unsupervised classification of eCCA filtering out these genes. The four molecular classes identified have an almost perfect overlap with the previously proposed clustering using the whole transcriptome: Four Mesenchymal class tumors classified now as a Metabolic class; One Proliferation class tumor classified now as a Metabolic class; and one Immune class tumor classified now as Mesenchymal class. GSEA was used to obtain the enrichment plot. Unsupervised classification of eCCA was done by non-negative matrix factorization consensus.

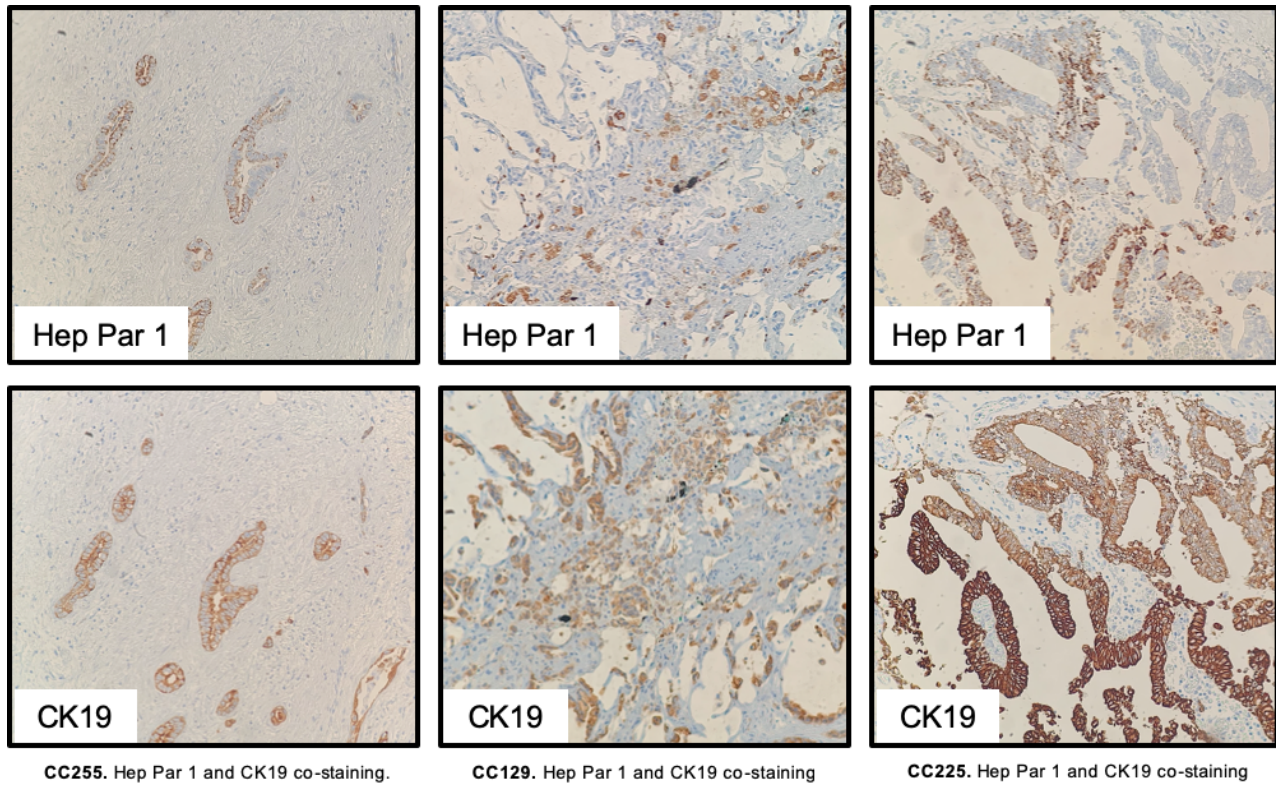

**Supplementary Fig. 7. Hep Par 1 and CK19 co-staining in Metabolic eCCA class.**

Hep Par 1 (hepatocyte marker) and CK19 (cholangiocyte maker) IHC was conducted on a subset of the eCCA cohort (n=53) including Metabolic (n=23) and non-Metabolic tumors (Proliferation=6, Mesenchymal=19 and Immune=5). All tumors (100%) had a positive staining for CK19. On the other hand, positive staining for Hep Par 1 was observed in 14 tumors, most of them from the Metabolic class (Metabolic=43% vs Rest=13%,  $p=0.026$ ). P value was calculated using a two-sided Fisher's exact test.

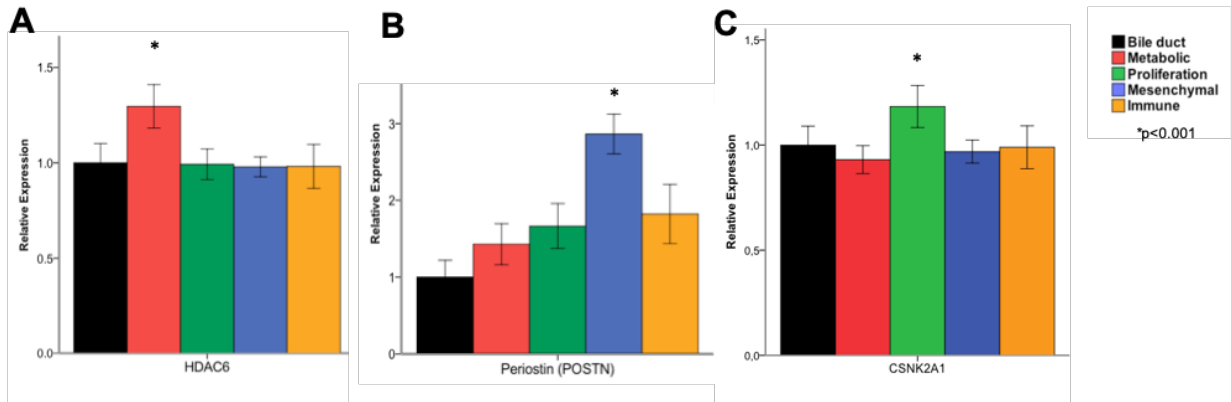

**Supplementary Fig. 8. Overexpressed genes defining eCCA molecular classes.**

Relative RNA expression of **(A)**, Histone deacetylase 6 (*HDAC6*); **(B)**, Periostin (*POSTN*); and **(C)**, Casein kinase 2 (*CSNK2A1*) in the four molecular eCCA classes in comparison to normal bile duct. P values were calculated using a two-sided T-test. Error bars represent 95% confidence intervals.

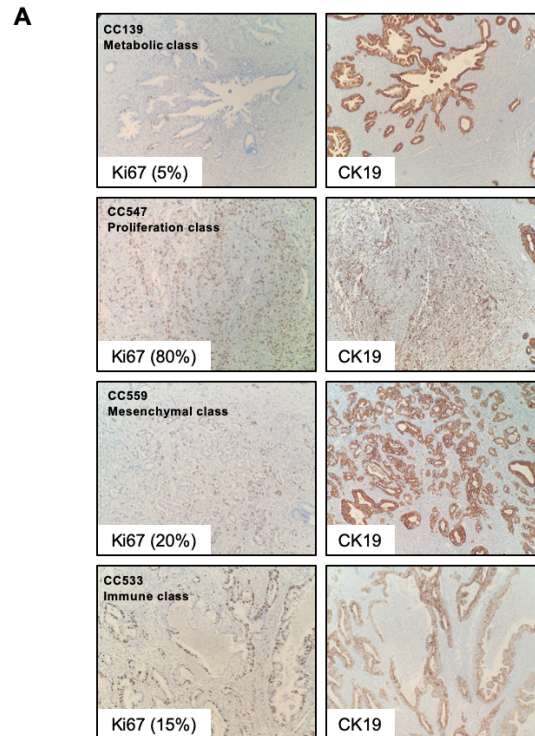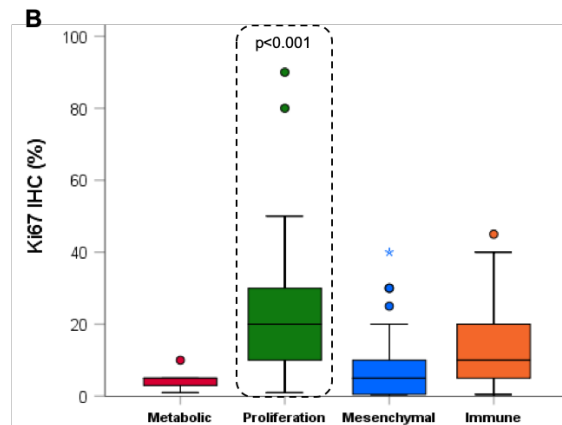

**Supplementary Fig. 9. Ki67 staining in eCCA tumors according to their molecular class.** Ki67 IHC was conducted in the eCCA cohort (Metabolic=8, Proliferation=33, Mesenchymal=67 and Immune=21). **(A)** Representative samples of each molecular class together with paired CK19 staining. **(B)** Box plots representing Ki67 index for eCCA molecular classes showing the highest percentage of staining in the Proliferation class ( $p < 0.001$ ). P values between the Proliferation class and the rest were calculated using T-Test.

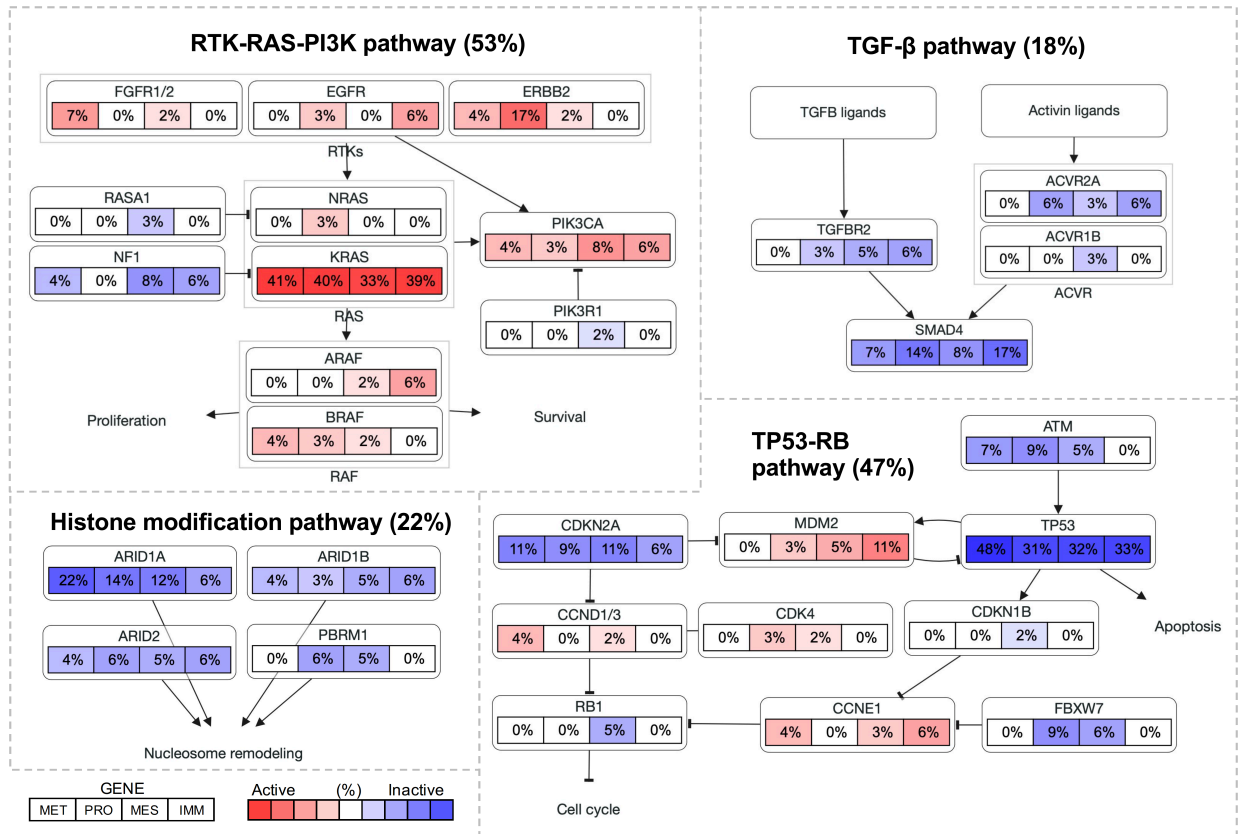

**Supplementary Fig. 10. Landscape of structural genomic alterations in eCCA molecular classes.** Pathway diagrams showing the percentage of samples from each molecular class with structural genomic alterations in genes from RTK-RAS-PI3K, TP53-RB, histone modification and TGFβ pathways. Red and blue mean alterations leading to activation or inactivation of the gene, respectively.

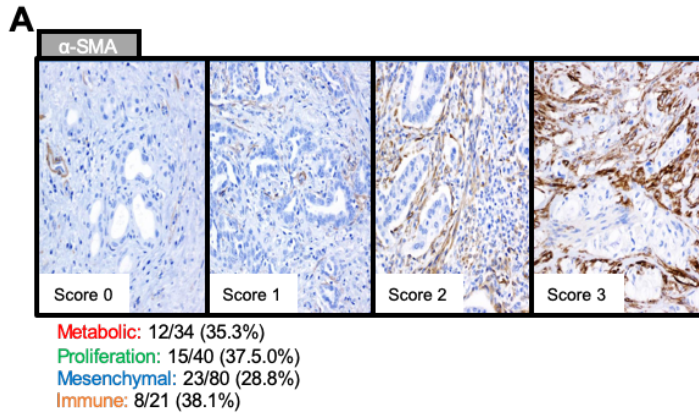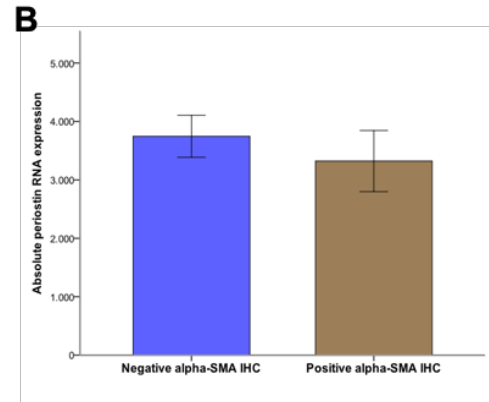

**Supplementary Fig. 11.  $\alpha$ -SMA and periostin in eCCA molecular classes. (A)**, Protein expression of  $\alpha$ -SMA assessed by IHC. The total number of eCCA samples with a positive staining ( $\geq 2$  intensity in  $>50\%$  of fibroblasts) per molecular class is presented. **(B)**, Absolute RNA expression of periostin depending on  $\alpha$ -SMA positivity. Error bars represent 95% confidence intervals.

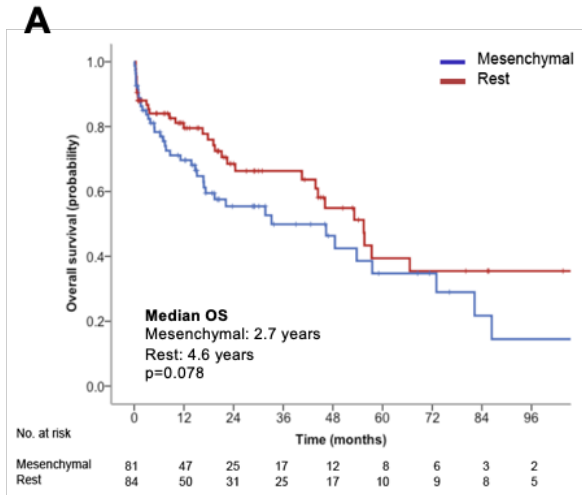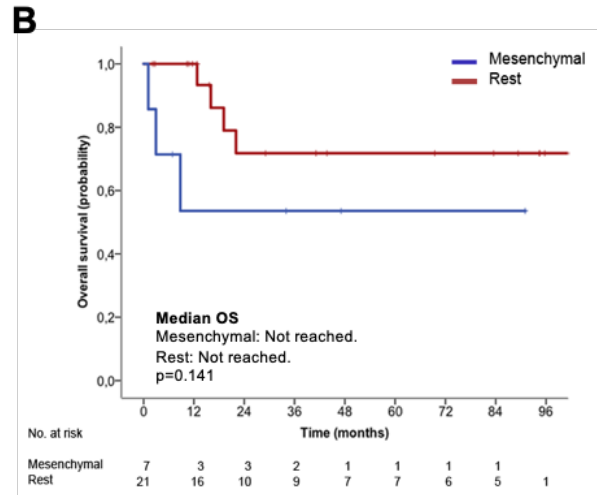

**Supplementary Fig. 12. Clinical outcome of mesenchymal eCCA patients.** Kaplan-Meier curves comparing OS in the mesenchymal eCCA class vs rest in the: **(A)**, internal; and **(B)**, external (ICGC) eCCA cohorts. Log-rank test was used to analyze survival data.

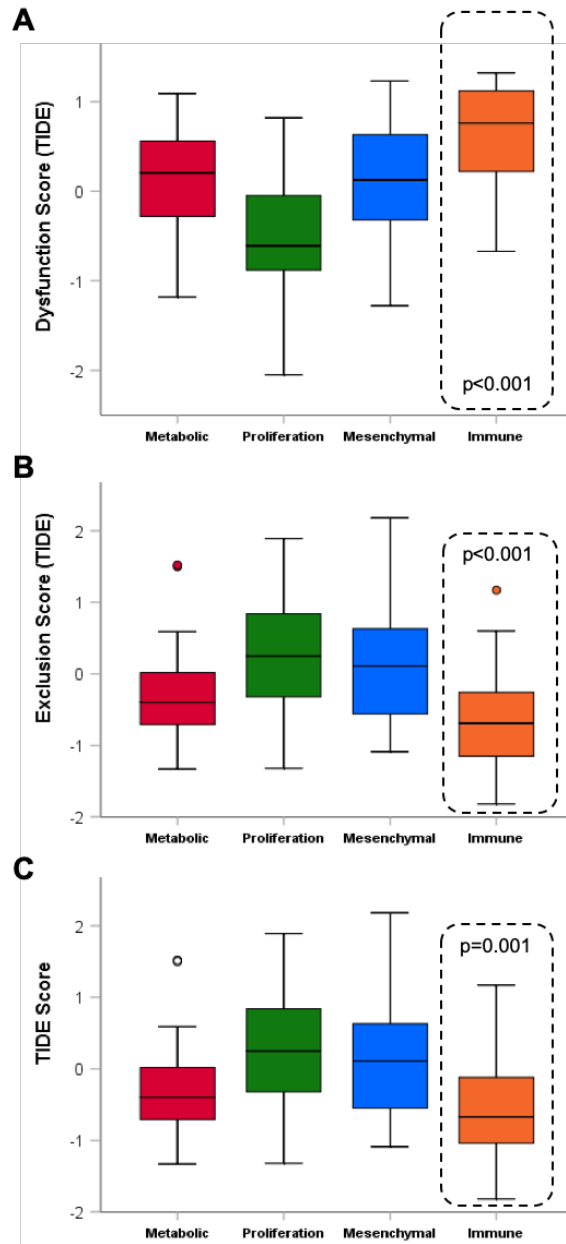

**Supplementary Fig. 13. T cell functionality in eCCA molecular classes.** Box plots representing the estimation of: **(A)** T cell dysfunction; and **(B)** T cell exclusion in each eCCA molecular class using gene expression data (TIDE software). TIDE score **(C)** merges the weight of the two previous T cell categories in order to predict response to immune checkpoint inhibitors (low scores indicating high probability of clinical benefit). P values between the eCCA Immune class and the rest were calculated using T-Test.



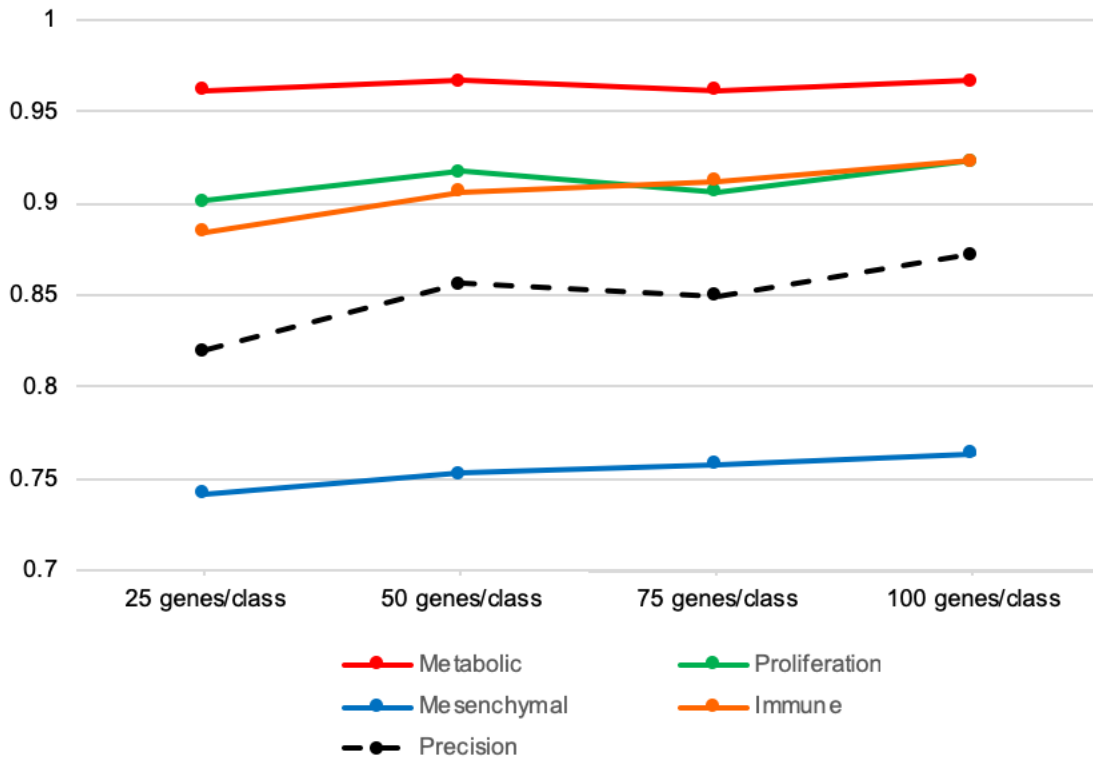

**Supplementary Fig. 14. Accuracy of gene-expression eCCA classifiers.** Line graph representing the accuracy per class (true positives + true negatives / eCCA samples) of different proposed gene-expression classifiers based on the maximum number of genes used for defining each class (25, 50, 75 and 100). Precision refers to positive predictive value (number of true positives / number of positive calls).

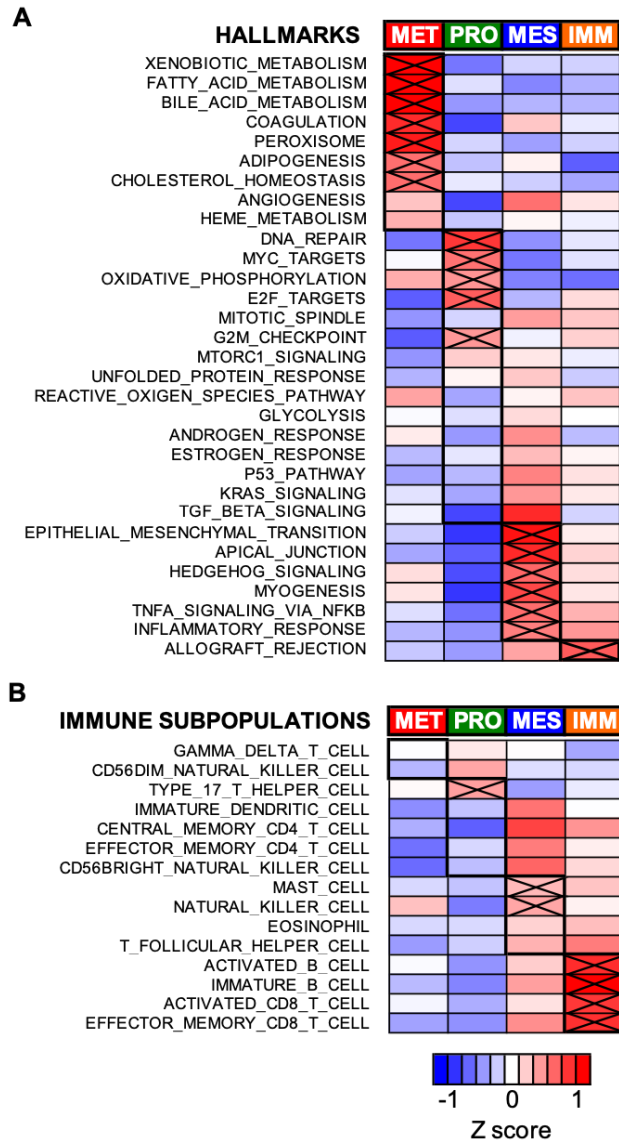

**Supplementary Fig. 15. External validation of biological features defining eCCA molecular classes. (A),** Heatmap of hallmark gene sets from MSigDB collections in the four molecular classes of eCCA inferred in the external ICGC cohort of CCA. **(B),** Heatmap of immune subpopulations inferred by gene expression of immune metagenes described in The Cancer Immunome Atlas in the four molecular classes of eCCA inferred in the external ICGC cohort of CCA. P values between a specific molecular class and the rest were calculated using T-Test, being crossed cells lower than 0.05.

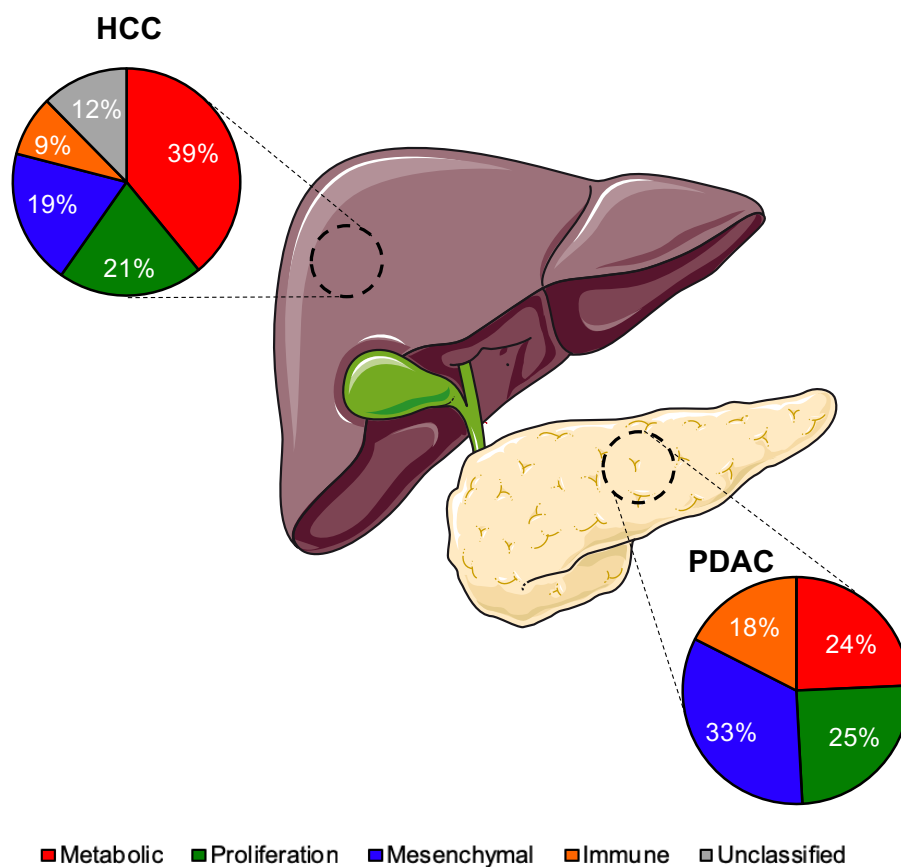

**Supplementary Fig. 16. Distribution of eCCA molecular classes in HCC and PDAC.**

Prediction of eCCA molecular classes in samples from HCC-HEPTROMIC (n=228)[30], HCC-TCGA (n=362)[31] and PDAC-TCGA (n=177)[32] projects applying the 174-gene classifier. HCC: Hepatocellular carcinoma; PDAC: Pancreatic ductal adenocarcinoma.

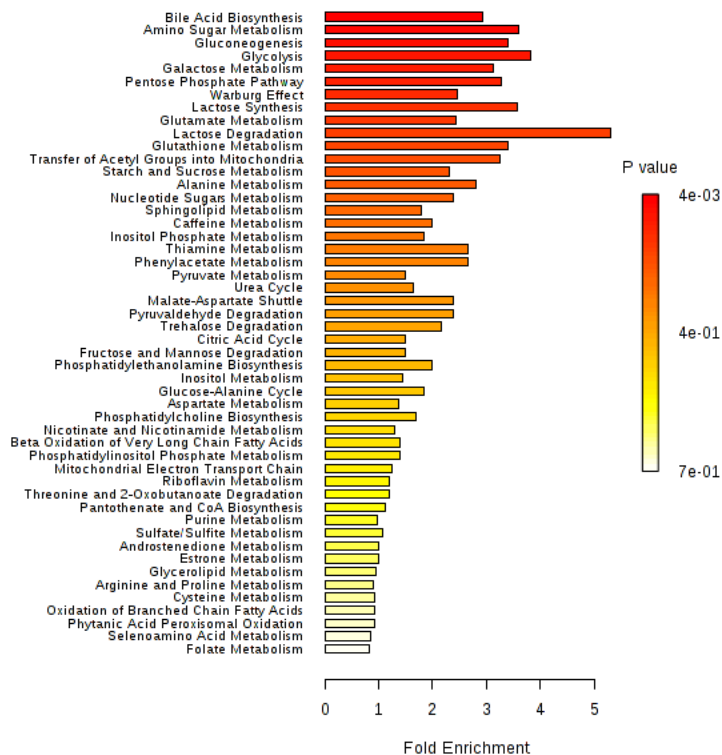

**Supplementary Fig. 17. Metabolite enrichment analysis of TIGER-LC Metabolic-like tumors.** Of the 140 liver tumors (HCC and iCCA) with paired transcriptome-metabolome in the TIGER-LC Consortium, 50 (36%) had a transcriptomic profile resembling the eCCA Metabolic class. Up to 51 metabolites were significantly more abundant in these tumors in comparison to the rest ( $p < 0.05$ , two-sided T-test). Using Metabolite Set Enrichment Analysis from MetaboAnalyst 4.0[29], a summary plot for Over Representation Analysis (ORA) was obtained. ORA was implemented using the hypergeometric test to evaluate whether a particular metabolite set is represented more than expected by chance within the given compound list. One-tailed p values are provided after adjusting for multiple testing.

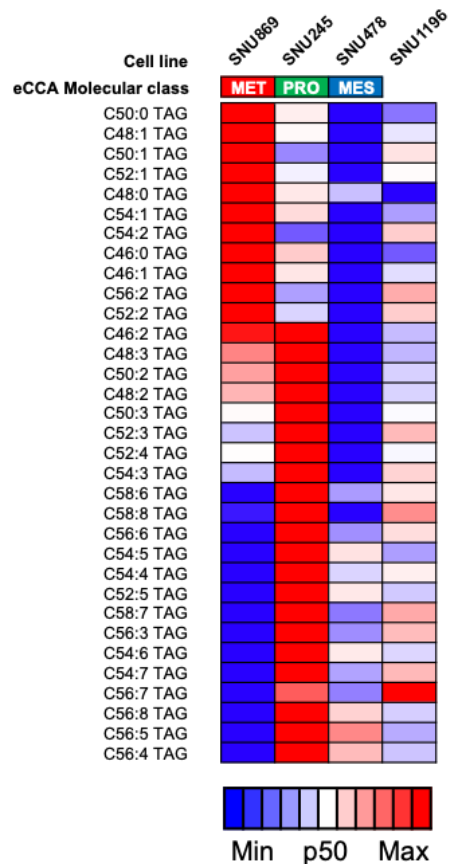

**Supplementary Fig. 18. Differential abundance of triacylglycerol (TAG) species in eCCA cell lines.** Heatmap showing relative levels of triacylglycerol (TAG) species in 4 eCCA cell lines from the Cancer Cell Line Encyclopedia (CCLE). Using the eCCA gene-expression classifier, SNU869, SNU245 and SNU478 resembled Metabolic, Proliferation and Mesenchymal eCCA classes, respectively. SNU869 Metabolic-like cell line presented high levels of monounsaturated fatty acids (MUFA) and low levels of polyunsaturated TAG, a pattern predicted to be sensitive to the loss of CTNNB1[33].

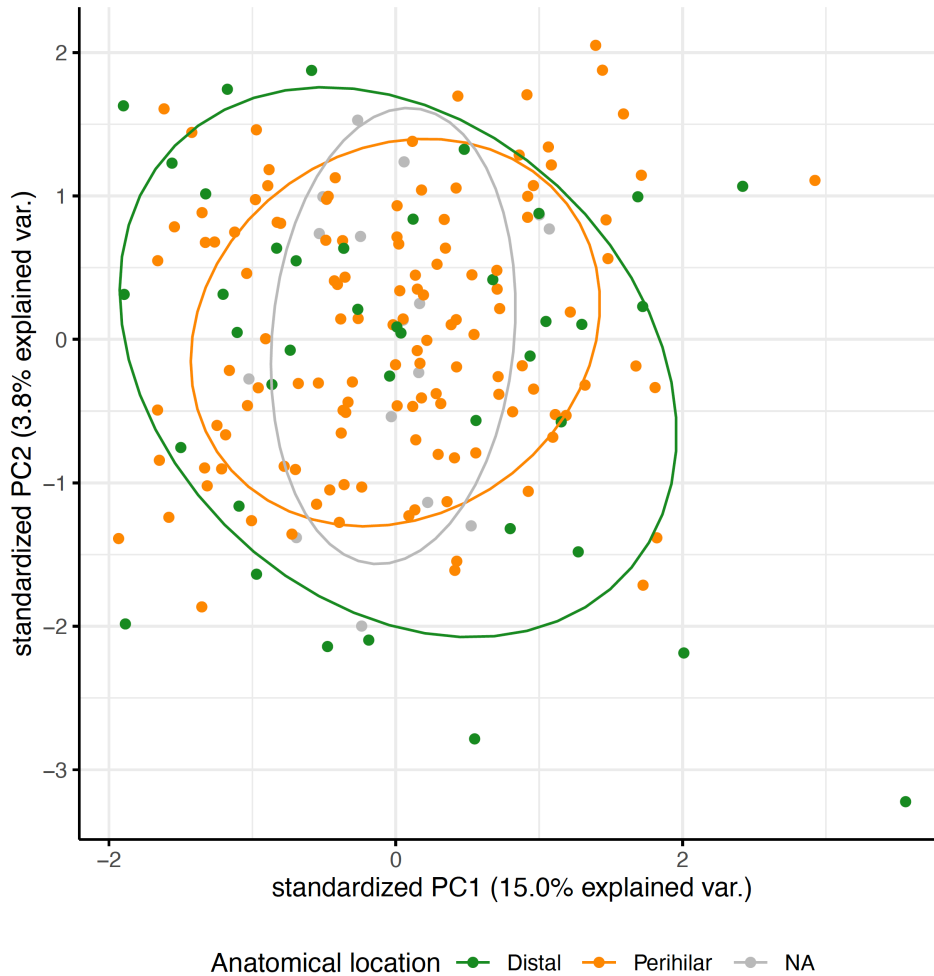

**Supplementary Fig. 19. Distribution of pCCA and dCCA samples after a Principal Component Analysis (PCA) with transcriptome data.** The data was inputted to the `prcomp` function from the R package `stats` v3.6.2 to perform PCA after scaling variables to have unit variance and shifting them to be zero centered. The resulting distribution of the samples according to PC1 and PC2 was visualized using the R package `ggbiplot` v0.55.

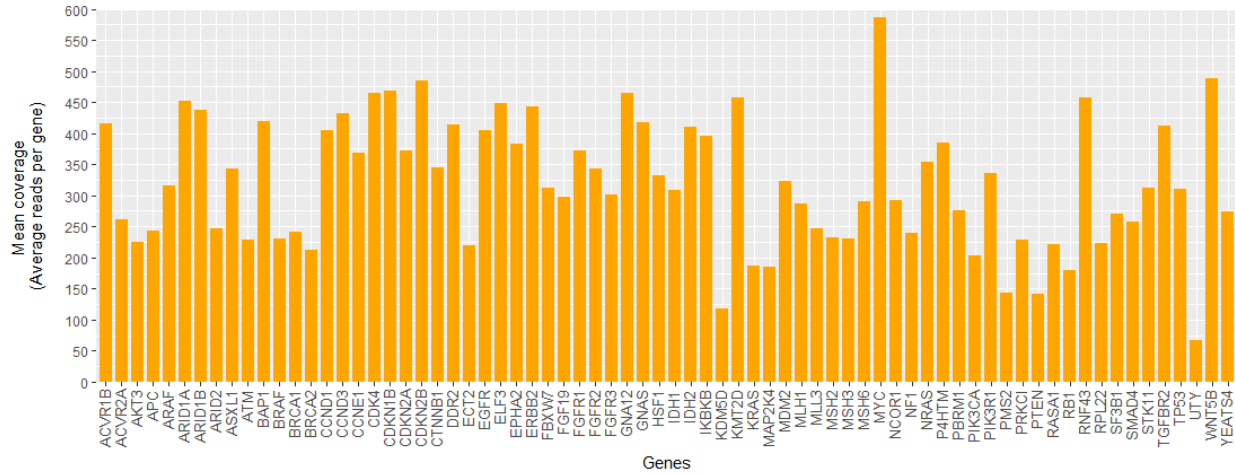

**Supplementary Fig. 20. Mean coverage per gene.** Average read depth of the 72 genes analyzed by exome-sequencing in 150 eCCA tumoral samples. Genes are sorted alphabetically.





<sup>2</sup>(30), <sup>3</sup>(52), <sup>4</sup>(46), <sup>5</sup>(27), <sup>6</sup>(17), <sup>7</sup>(31), <sup>8</sup>(21), <sup>9</sup>(22), <sup>10</sup>(33), <sup>11</sup>(34), <sup>12</sup>(62), <sup>13</sup>(78) and <sup>14</sup>(95) patients. <sup>15</sup>More than one possible.

**Supplementary Table 2. Genes included in the targeted DNA-sequencing panel.**

| Gene          | Alteration type | BTC (%) | iCCA (%) | eCCA (%) |
|---------------|-----------------|---------|----------|----------|
| <i>ACVR1B</i> | Mut             | 2%      | 1%       | 2%       |
| <i>ACVR2A</i> | Mut             | 3-4%    | 3%       | 6%       |
| <i>AKT3</i>   | Amp             | 3%      |          |          |
| <i>APC</i>    | Mut             | 5-7%    | 5%       | 6-11%    |
| <i>ARAF</i>   | Mut             | 5%      | 5%       |          |
| <i>ARID1A</i> | Mut             | 11-17%  | 15-19%   | 7-15%    |
| <i>ARID1B</i> | Mut             | 4%      | 2%       | 7%       |
| <i>ARID2</i>  | Mut             | 5-6%    | 4%       | 5-8%     |
| <i>ASXL1</i>  | Mut             | 2-3%    | 2%       | 3-4%     |
| <i>ATM</i>    | Mut             | 4%      |          | 6%       |
| <i>BAP1</i>   | Mut             | 8%      | 11-12%   | 3-4%     |
| <i>BRAF</i>   | Mut             | 3%      | 3%       | 2%       |
| <i>BRCA1</i>  | Mut             | 1%      |          | 1%       |
| <i>BRCA2</i>  | Mut             | 4-5%    | 3%       | 4%       |
| <i>CCND1</i>  | Amp             | 3%      | 3%       | 5%       |
| <i>CCND3</i>  | Amp             | 3%      | 3%       |          |
| <i>CCNE1</i>  | Amp             | 2%      | 0%       | 5%       |
| <i>CDK4</i>   | Amp             | 5%      |          |          |
| <i>CDKN1B</i> | Mut             | 1%      | 1%       | 1%       |
| <i>CDKN2A</i> | Del             | 5%      | 4%       | 5-28%    |
| <i>CDKN2B</i> | Del             |         |          | 15%      |
| <i>CTNNB1</i> | Mut             | 1%      | 1%       | 2%       |
| <i>DDR2</i>   | Amp             | 4%      |          |          |
| <i>ECT2</i>   | Amp             | 3%      |          |          |
| <i>EGFR</i>   | Amp             | 5%      | 4%       | 1%       |
| <i>ELF3</i>   | Mut             | 5-6%    | 4%       | 10%      |
| <i>EPHA2</i>  | Mut             | 5%      | 10%      | 0%       |
| <i>ERBB2</i>  | Mut/Amp         | 5%      | 5%       | 4-9%     |
| <i>FBXW7</i>  | Mut             | 3-4%    |          | 4-5%     |
| <i>FGF19</i>  | Amp             | 3%      |          | 5%       |
| <i>FGFR1</i>  | Amp             | 4%      | 7%       | 0%       |
| <i>FGFR2</i>  | Amp/Fus/Mut     | 5%      | 8%       | 0%       |
| <i>FGFR3</i>  | Amp             | 4%      | 5%       | 3%       |
| <i>GNA12</i>  | Amp             | 3%      |          |          |
| <i>GNAS</i>   | Mut             | 6%      |          | 5%       |
| <i>HSF1</i>   | Amp             | 4%      |          |          |
| <i>IDH1</i>   | Mut             | 3%      | 4-6%     | 0-2%     |
| <i>IDH2</i>   | Mut             | 1%      | 2%       | 1%       |
| <i>IKBKB</i>  | Amp             | 3%      |          |          |
| <i>KDM5D</i>  | Del             | 2%      | 2%       | 4%       |
| <i>KMT2D</i>  | Mut             | 7%      | 7%       | 5%       |
| <i>KRAS</i>   | Mut             | 17-18%  | 20-25%   | 10-43%   |
| <i>MAP2K4</i> | Mut             | 2%      | 2%       | 2%       |
| <i>MDM2</i>   | Amp             | 5%      | 5%       | 5%       |
| <i>MLL1*</i>  | Mut             |         |          |          |
| <i>MLL3</i>   | Mut             | 3%      | 3%       | 4%       |
| <i>MSH2*</i>  | Mut             |         |          |          |
| <i>MSH3</i>   | Mut             | 2%      | 1%       | 4%       |
| <i>MSH6*</i>  | Mut             |         |          |          |
| <i>MYC</i>    | Amp             | 5%      | 6%       | 4-6%     |
| <i>NCOR1</i>  | Mut             | 2%      | 2%       | 2%       |
| <i>NF1</i>    | Mut             | 5%      | 5%       | 5-6%     |
| <i>NRAS</i>   | Mut             | 2-3%    | 3-5%     | 1-5%     |
| <i>P4HTM</i>  | Mut             | 1%      | 1%       | 1%       |
| <i>PBRM1</i>  | Mut             | 5-7%    | 8%       | 0-4%     |
| <i>PIK3CA</i> | Mut             | 7%      | 8%       | 4%       |
| <i>PIK3R1</i> | Mut             | 3%      | 2%       | 3-4%     |
| <i>PMS2*</i>  | Mut             |         |          |          |
| <i>PRKCI</i>  | Amp             | 4%      |          |          |
| <i>PTEN</i>   | Mut             | 3%      | 1%       | 5-7%     |
| <i>RASA1</i>  | Mut             | 4%      | 4%       | 4%       |
| <i>RB1</i>    | Mut             | 3%      | 2%       | 4%       |
| <i>RNF43</i>  | Mut             | 5%      | 4%       | 5%       |
| <i>RPL22</i>  | Mut             | 3%      |          |          |
| <i>SF3B1</i>  | Mut             | 5%      | 4%       | 6%       |
| <i>SMAD4</i>  | Mut             | 9-13%   | 10-11%   | 10-16%   |
| <i>STK11</i>  | Mut             | 3-5%    | 4%       | 7%       |
| <i>TERT</i>   | Mut (promoter)  | 3%      |          |          |
| <i>TGFBR2</i> | Mut             | 2-3%    | 2%       | 3%       |
| <i>TP53</i>   | Mut/Del         | 26-32%  | 23-30%   | 26-45%   |
| <i>UTY</i>    | Del             | 2%      | 2%       | 3%       |
| <i>WNT5B</i>  | Amp             | 4%      |          |          |
| <i>YEATS4</i> | Amp             | 5%      |          |          |

Structural genomic alterations recurrently observed in BTC and specifically in eCCA based on bibliography[3,34–37]. \*Due to clinical relevance, MMR genes were included despite being rarely mutated in BTC.

**Supplementary Table 3. Driver mutations identified in eCCA.**

| Sample | Class         | Gene   | Allele frequency | Role      | Protein       | Consequence            | Driver    |
|--------|---------------|--------|------------------|-----------|---------------|------------------------|-----------|
| CC129  | Metabolic     | KRAS   | 0.18             | Act       | p.G12D        | Missense               | known     |
| CC129  | Metabolic     | SMAD4  | 0.27             | LoF       | p.C363F       | Missense               | predicted |
| CC129  | Metabolic     | TP53   | 0.19             | LoF       | p.R337C       | Missense               | known     |
| CC131  | Proliferation | IDH1   | 0.20             | Act       | p.R132C       | Missense               | known     |
| CC133  | Mesenchymal   | CDKN2A | 0.26             | LoF       | p.D74Y        | Missense               | known     |
| CC133  | Mesenchymal   | EPHA2  | 0.19             | LoF       | p.V152Dfs*12  | Frameshift             | predicted |
| CC133  | Mesenchymal   | TP53   | 0.14             | LoF       | p.V73Rfs*76   | Frameshift             | known     |
| CC135  | Metabolic     | ERBB2  | 0.50             | Act       | p.I654V       | Missense               | known     |
| CC135  | Metabolic     | KRAS   | 0.08             | Act       | p.G12V        | Missense               | known     |
| CC135  | Metabolic     | TP53   | 0.10             | LoF       | p.R248W       | Missense               | known     |
| CC139  | Metabolic     | KRAS   | 0.08             | Act       | p.G12R        | Missense               | known     |
| CC139  | Metabolic     | SMAD4  | 0.11             | LoF       | p.R361H       | Missense               | known     |
| CC139  | Metabolic     | TP53   | 0.12             | LoF       | p.R273S       | Missense               | known     |
| CC141  | Mesenchymal   | CDKN2A | 0.12             | LoF       | p.W110*       | Nonsense               | known     |
| CC141  | Mesenchymal   | KRAS   | 0.20             | Act       | p.G12V        | Missense               | known     |
| CC141  | Mesenchymal   | TP53   | 0.05             | LoF       | p.C242Afs*5   | Frameshift             | predicted |
| CC145  | Mesenchymal   | CDKN2A | 0.12             | LoF       | p.P48L        | Missense               | known     |
| CC145  | Mesenchymal   | KRAS   | 0.25             | Act       | p.G12V        | Missense               | known     |
| CC145  | Mesenchymal   | TP53   | 0.13             | LoF       | p.R248W       | Missense               | known     |
| CC147  | Immune        | EPHA2  | 0.44             | LoF       | p.G391R       | Missense               | known     |
| CC147  | Immune        | KRAS   | 0.14             | Act       | p.Q61H        | Missense               | known     |
| CC147  | Immune        | SMAD4  | 0.07             | LoF       | p.V492*fs*1   | Frameshift             | predicted |
| CC149  | Metabolic     | ATM    | 0.55             | LoF       | p.Y2791Gfs*14 | Frameshift             | predicted |
| CC149  | Metabolic     | KRAS   | 0.22             | Act       | p.E62V        | Missense               | predicted |
| CC149  | Metabolic     | KRAS   | 0.22             | Act       | p.Q61R        | Missense               | known     |
| CC151  | Proliferation | ERBB2  | 0.49             | Act       | p.I654V       | Missense               | known     |
| CC151  | Proliferation | TP53   | 0.09             | LoF       | p.L35Cfs*9    | Frameshift             | predicted |
| CC155  | NA            | TGFBR2 | 0.15             | LoF       |               | SpliceDonorInsertion   | predicted |
| CC159  | Proliferation | BAP1   | 0.62             | LoF       | p.Y129*       | Nonsense               | predicted |
| CC159  | Proliferation | NRAS   | 0.22             | Act       | p.Q61R        | Missense               | known     |
| CC159  | Proliferation | PBRM1  | 0.58             | LoF       |               | SpliceDonorSNV         | predicted |
| CC163  | Metabolic     | FGFR1  | 0.07             | Act       | p.R501H       | Missense               | predicted |
| CC163  | Metabolic     | TP53   | 0.14             | LoF       | p.R282W       | Missense               | known     |
| CC163  | Metabolic     | TP53   | 0.11             | LoF       | p.A276Lfs*29  | Frameshift             | predicted |
| CC165  | Proliferation | FBXW7  | 0.11             | LoF       | p.R465C       | Missense               | known     |
| CC165  | Proliferation | TP53   | 0.17             | LoF       | p.R196*       | Nonsense               | known     |
| CC169  | Mesenchymal   | ACVR2A | 0.11             | LoF       | p.K437Rfs*5   | Frameshift             | predicted |
| CC169  | Mesenchymal   | MLH1   | 0.46             | LoF       |               | SpliceAcceptorDeletion | known     |
| CC169  | Mesenchymal   | MSH3   | 0.08             | LoF       | p.K383Rfs*32  | Frameshift             | predicted |
| CC169  | Mesenchymal   | RNF43  | 0.48             | LoF       | p.P192L       | Missense               | predicted |
| CC169  | Mesenchymal   | SF3B1  | 0.06             | Act       | p.R625C       | Missense               | known     |
| CC173  | Proliferation | ARID1A | 0.07             | LoF       | p.Q211*       | Nonsense               | predicted |
| CC173  | Proliferation | ARID1B | 0.14             | LoF       | p.D666Rfs*21  | Frameshift             | predicted |
| CC173  | Proliferation | BRAF   | 0.13             | Act       | p.V600E       | Missense               | known     |
| CC177  | Proliferation | ERBB2  | 0.07             | Act       | p.S310F       | Missense               | known     |
| CC177  | Proliferation | IKBKB  | 0.05             | Ambiguous | p.R220W       | Missense               | predicted |
| CC177  | Proliferation | TP53   | 0.07             | LoF       | p.E171*       | Nonsense               | predicted |
| CC187  | Immune        | BAP1   | 0.10             | LoF       | p.D11Y        | Missense               | predicted |
| CC187  | Immune        | KRAS   | 0.08             | Act       | p.G12D        | Missense               | known     |
| CC189  | Immune        | TP53   | 0.10             | LoF       | p.V122Dfs*26  | Frameshift             | known     |
| CC191  | Mesenchymal   | KRAS   | 0.14             | Act       | p.G12D        | Missense               | known     |
| CC191  | Mesenchymal   | PIK3CA | 0.06             | Act       | p.E707K       | Missense               | predicted |
| CC201  | Proliferation | ERBB2  | 0.49             | Act       | p.I654V       | Missense               | known     |
| CC203  | Proliferation | BRCA1  | 0.42             | LoF       | p.S157*fs*1   | Frameshift             | known     |
| CC203  | Proliferation | CDKN2A | 0.06             | LoF       | p.R80*        | Nonsense               | known     |
| CC203  | Proliferation | KRAS   | 0.15             | Act       | p.G12A        | Missense               | known     |
| CC203  | Proliferation | SF3B1  | 0.07             | Act       | p.W658C       | Missense               | predicted |
| CC205  | Mesenchymal   | BAP1   | 0.62             | LoF       | p.P629Tfs*14  | Frameshift             | predicted |
| CC205  | Mesenchymal   | EPHA2  | 0.49             | LoF       | p.G391R       | Missense               | known     |
| CC205  | Mesenchymal   | FBXW7  | 0.20             | LoF       | p.H540Ifs*16  | Frameshift             | predicted |
| CC205  | Mesenchymal   | SF3B1  | 0.18             | Act       | p.D894Y       | Missense               | predicted |
| CC211  | Proliferation | ATM    | 0.05             | LoF       | p.F897Sfs*2   | Frameshift             | predicted |
| CC211  | Proliferation | SMAD4  | 0.05             | LoF       | p.A190Qfs*10  | Frameshift             | predicted |
| CC213  | Proliferation | ARID2  | 0.13             | LoF       | p.Q288*       | Nonsense               | predicted |

|       |               |        |      |     |               |                   |           |
|-------|---------------|--------|------|-----|---------------|-------------------|-----------|
| CC213 | Proliferation | KRAS   | 0.11 | Act | p.G12D        | Missense          | known     |
| CC215 | Mesenchymal   | ACVR1B | 0.26 | LoF | p.P470Q       | Missense          | predicted |
| CC215 | Mesenchymal   | ACVR1B | 0.10 | LoF | p.H358N       | Missense          | predicted |
| CC215 | Mesenchymal   | APC    | 0.37 | LoF | p.S1857*      | Nonsense          | predicted |
| CC215 | Mesenchymal   | ARID1B | 0.23 | LoF | p.G1159W      | Missense          | predicted |
| CC215 | Mesenchymal   | ARID2  | 0.36 | LoF | p.E194*       | Nonsense          | predicted |
| CC215 | Mesenchymal   | CCND1  | 0.20 | Act | p.T286K       | Missense          | predicted |
| CC215 | Mesenchymal   | FBXW7  | 0.08 | LoF | p.C386F       | Missense          | predicted |
| CC215 | Mesenchymal   | FGFR1  | 0.16 | Act | p.W99L        | Missense          | predicted |
| CC215 | Mesenchymal   | IDH2   | 0.26 | Act | p.G325C       | Missense          | predicted |
| CC215 | Mesenchymal   | MAP2K4 | 0.07 | LoF | p.E202*       | Nonsense          | predicted |
| CC215 | Mesenchymal   | NF1    | 0.28 | LoF | p.S1329*      | Nonsense          | predicted |
| CC215 | Mesenchymal   | NF1    | 0.23 | LoF | p.E715*       | Nonsense          | predicted |
| CC215 | Mesenchymal   | PBRM1  | 0.34 | LoF | p.G1422C      | Missense          | predicted |
| CC215 | Mesenchymal   | PIK3CA | 0.10 | Act | p.T1052K      | Missense          | predicted |
| CC215 | Mesenchymal   | RASA1  | 0.44 | LoF | .             | SpliceDonorSNV    | predicted |
| CC215 | Mesenchymal   | SF3B1  | 0.32 | Act | p.G915C       | Missense          | predicted |
| CC215 | Mesenchymal   | SMAD4  | 0.11 | LoF | p.G270*       | Nonsense          | predicted |
| CC215 | Mesenchymal   | TP53   | 0.34 | LoF | p.V173L       | Missense          | known     |
| CC217 | Mesenchymal   | ARAF   | 0.14 | Act | p.G322S       | Missense          | known     |
| CC219 | Immune        | KRAS   | 0.36 | Act | p.G12V        | Missense          | known     |
| CC221 | Mesenchymal   | RNF43  | 0.49 | LoF | p.G336D       | Missense          | predicted |
| CC221 | Mesenchymal   | SMAD4  | 0.10 | LoF | .             | SpliceAcceptorSNV | predicted |
| CC223 | Mesenchymal   | ARID2  | 0.08 | LoF | p.Q917*       | Nonsense          | predicted |
| CC223 | Mesenchymal   | ELF3   | 0.08 | LoF | p.F303L       | Missense          | predicted |
| CC225 | Metabolic     | ARID1A | 0.17 | LoF | p.S11Afs*90   | Frameshift        | predicted |
| CC225 | Metabolic     | BRCA2  | 0.48 | LoF | p.S1982Rfs*22 | Frameshift        | known     |
| CC225 | Metabolic     | ELF3   | 0.18 | LoF | p.K304Qfs*167 | Frameshift        | predicted |
| CC225 | Metabolic     | RNF43  | 0.33 | LoF | p.L7Sfs*12    | Frameshift        | predicted |
| CC227 | Mesenchymal   | KRAS   | 0.06 | Act | p.G12D        | Missense          | known     |
| CC229 | Metabolic     | ARID1A | 0.18 | LoF | p.Y1055Cfs*49 | Frameshift        | predicted |
| CC229 | Metabolic     | KRAS   | 0.19 | Act | p.G12V        | Missense          | known     |
| CC229 | Metabolic     | TP53   | 0.34 | LoF | p.R175H       | Missense          | known     |
| CC233 | Proliferation | KRAS   | 0.07 | Act | p.G12D        | Missense          | known     |
| CC233 | Proliferation | TP53   | 0.08 | LoF | p.H214R       | Missense          | known     |
| CC237 | Immune        | TP53   | 0.15 | LoF | p.V122Dfs*26  | Frameshift        | known     |
| CC241 | Proliferation | BAP1   | 0.16 | LoF | .             | SpliceDonorSNV    | predicted |
| CC241 | Proliferation | ELF3   | 0.16 | LoF | p.Q65Sfs*92   | Frameshift        | predicted |
| CC241 | Proliferation | RNF43  | 0.47 | LoF | p.R221Q       | Missense          | predicted |
| CC241 | Proliferation | STK11  | 0.22 | LoF | p.Q159*       | Nonsense          | predicted |
| CC241 | Proliferation | TGFBR2 | 0.13 | LoF | p.P154Afs*3   | Frameshift        | predicted |
| CC243 | NA            | EPHA2  | 0.44 | LoF | p.G391R       | Missense          | known     |
| CC245 | Mesenchymal   | ARID1A | 0.08 | LoF | p.S769*       | Nonsense          | predicted |
| CC245 | Mesenchymal   | ARID1A | 0.06 | LoF | p.V2041Gfs*58 | Frameshift        | predicted |
| CC245 | Mesenchymal   | MLL2   | 0.08 | LoF | p.P4820Qfs*38 | Frameshift        | predicted |
| CC245 | Mesenchymal   | RASA1  | 0.12 | LoF | p.R398*       | Nonsense          | predicted |
| CC245 | Mesenchymal   | TP53   | 0.09 | LoF | p.R306*       | Nonsense          | known     |
| CC247 | Proliferation | EPHA2  | 0.50 | LoF | p.G391R       | Missense          | known     |
| CC247 | Proliferation | IDH2   | 0.52 | Act | p.I98T        | Missense          | predicted |
| CC249 | NA            | ARID1A | 0.08 | LoF | p.Q605*       | Nonsense          | predicted |
| CC249 | NA            | KRAS   | 0.09 | Act | p.Q61H        | Missense          | known     |
| CC255 | Metabolic     | ATM    | 0.45 | LoF | p.L2307F      | Missense          | predicted |
| CC255 | Metabolic     | TP53   | 0.06 | LoF | p.R273H       | Missense          | known     |
| CC257 | Metabolic     | BRCA2  | 0.55 | LoF | p.E1688*      | Nonsense          | predicted |
| CC257 | Metabolic     | CDKN2A | 0.13 | LoF | p.L78Hfs*41   | Frameshift        | predicted |
| CC257 | Metabolic     | KRAS   | 0.16 | Act | p.G12V        | Missense          | known     |
| CC257 | Metabolic     | TP53   | 0.15 | LoF | p.L194R       | Missense          | predicted |
| CC259 | Metabolic     | KRAS   | 0.12 | Act | p.G12D        | Missense          | known     |
| CC261 | Immune        | ARID1A | 0.06 | LoF | p.P109Efs*3   | Frameshift        | predicted |
| CC261 | Immune        | KRAS   | 0.05 | Act | p.G12D        | Missense          | known     |
| CC261 | Immune        | SMAD4  | 0.06 | LoF | p.R361S       | Missense          | known     |
| CC265 | Metabolic     | ARID1A | 0.06 | LoF | p.S1791Qfs*15 | Frameshift        | predicted |
| CC265 | Metabolic     | IDH2   | 0.06 | Act | p.R172S       | Missense          | known     |
| CC267 | Mesenchymal   | KRAS   | 0.07 | Act | p.G12D        | Missense          | known     |
| CC271 | Metabolic     | BRCA2  | 0.35 | LoF | p.V1610Gfs*4  | Frameshift        | known     |
| CC275 | Metabolic     | CDKN2A | 0.14 | LoF | p.Y44*fs*1    | Nonsense          | predicted |

|       |               |        |      |     |               |                        |           |
|-------|---------------|--------|------|-----|---------------|------------------------|-----------|
| CC275 | Metabolic     | TP53   | 0.12 | LoF | p.R248W       | Missense               | known     |
| CC299 | Metabolic     | KRAS   | 0.06 | Act | p.G12R        | Missense               | known     |
| CC301 | Mesenchymal   | ATM    | 0.06 | LoF | p.K1625Tfs*12 | Frameshift             | predicted |
| CC301 | Mesenchymal   | TGFBR2 | 0.07 | LoF | p.R520*       | Nonsense               | predicted |
| CC315 | NA            | NCOR1  | 0.06 | LoF | p.E179K       | Missense               | predicted |
| CC315 | NA            | SMAD4  | 0.21 | LoF | p.E374Sfs*3   | Frameshift             | predicted |
| CC315 | NA            | TP53   | 0.23 | LoF | p.L130V       | Missense               | predicted |
| CC317 | Mesenchymal   | ACVR1B | 0.08 | LoF | p.R485*       | Nonsense               | predicted |
| CC317 | Mesenchymal   | ARID1A | 0.11 | LoF | .             | SpliceDonorSNV         | predicted |
| CC323 | Mesenchymal   | CTNNB1 | 0.21 | Act | p.S45P        | Missense               | known     |
| CC323 | Mesenchymal   | EPHA2  | 0.39 | LoF | p.T511M       | Missense               | predicted |
| CC323 | Mesenchymal   | FBXW7  | 0.23 | LoF | p.Y519C       | Missense               | predicted |
| CC323 | Mesenchymal   | RB1    | 0.19 | LoF | p.Q257*       | Nonsense               | predicted |
| CC323 | Mesenchymal   | RB1    | 0.07 | LoF | p.Q344*       | Nonsense               | predicted |
| CC323 | Mesenchymal   | TP53   | 0.19 | LoF | p.R248Q       | Missense               | known     |
| CC333 | Metabolic     | ARID2  | 0.20 | LoF | p.Q1124*      | Nonsense               | predicted |
| CC333 | Metabolic     | FGFR2  | 0.35 | Act | p.R165Q       | Missense               | predicted |
| CC333 | Metabolic     | TP53   | 0.15 | LoF | p.G117V       | Missense               | predicted |
| CC333 | Metabolic     | TP53   | 0.15 | LoF | p.G117W       | Missense               | predicted |
| CC333 | Metabolic     | TP53   | 0.14 | LoF | p.P98S        | Missense               | predicted |
| CC335 | Proliferation | KRAS   | 0.08 | Act | p.G12D        | Missense               | known     |
| CC337 | Proliferation | APC    | 0.42 | LoF | p.T1556Nfs*3  | Frameshift             | predicted |
| CC337 | Proliferation | KRAS   | 0.34 | Act | p.G12V        | Missense               | known     |
| CC337 | Proliferation | SMAD4  | 0.43 | LoF | p.G386V       | Missense               | predicted |
| CC339 | Mesenchymal   | KRAS   | 0.21 | Act | p.G12V        | Missense               | known     |
| CC339 | Mesenchymal   | RNF43  | 0.09 | LoF | p.Q733*       | Nonsense               | predicted |
| CC345 | Proliferation | KRAS   | 0.12 | Act | p.G12D        | Missense               | known     |
| CC349 | Mesenchymal   | SMAD4  | 0.24 | LoF | p.I525V       | Missense               | predicted |
| CC351 | Proliferation | ELF3   | 0.10 | LoF | .             | SpliceAcceptorDeletion | predicted |
| CC351 | Proliferation | FBXW7  | 0.26 | LoF | p.R13*        | Nonsense               | predicted |
| CC351 | Proliferation | TP53   | 0.22 | LoF | p.Y220N       | Missense               | predicted |
| CC355 | Proliferation | CDKN2A | 0.25 | LoF | p.R58*        | Nonsense               | known     |
| CC355 | Proliferation | MSH6   | 0.41 | LoF | p.D1255Y      | Missense               | predicted |
| CC357 | Mesenchymal   | ASXL1  | 0.18 | LoF | p.G645Vfs*58  | Frameshift             | predicted |
| CC357 | Mesenchymal   | PBRM1  | 0.07 | LoF | p.R58*        | Nonsense               | predicted |
| CC359 | Metabolic     | KRAS   | 0.22 | Act | p.G12V        | Missense               | known     |
| CC359 | Metabolic     | TP53   | 0.12 | LoF | p.R175H       | Missense               | known     |
| CC361 | Metabolic     | EPHA2  | 0.21 | LoF | p.W801*       | Nonsense               | predicted |
| CC361 | Metabolic     | NCOR1  | 0.32 | LoF | p.R1229Q      | Missense               | predicted |
| CC361 | Metabolic     | PIK3CA | 0.11 | Act | p.E707K       | Missense               | predicted |
| CC363 | Metabolic     | RNF43  | 0.42 | LoF | p.S419Tfs*25  | Frameshift             | predicted |
| CC365 | Metabolic     | IDH2   | 0.29 | Act | p.R172K       | Missense               | known     |
| CC367 | Mesenchymal   | KRAS   | 0.10 | Act | p.G12A        | Missense               | known     |
| CC367 | Mesenchymal   | SF3B1  | 0.06 | Act | p.R625C       | Missense               | known     |
| CC369 | Proliferation | ARID1A | 0.18 | LoF | p.Q605*       | Nonsense               | predicted |
| CC369 | Proliferation | PBRM1  | 0.15 | LoF | p.R876C       | Missense               | predicted |
| CC369 | Proliferation | TP53   | 0.13 | LoF | .             | SpliceAcceptorSNV      | predicted |
| CC369 | Proliferation | TP53   | 0.10 | LoF | p.R196*       | Nonsense               | known     |
| CC371 | Mesenchymal   | TP53   | 0.17 | LoF | p.I254Hfs*10  | Frameshift             | predicted |
| CC383 | Proliferation | ATM    | 0.28 | LoF | p.P2842L      | Missense               | predicted |
| CC383 | Proliferation | KRAS   | 0.38 | Act | p.G12C        | Missense               | known     |
| CC383 | Proliferation | STK11  | 0.48 | LoF | p.K44Sfs*7    | Frameshift             | predicted |
| CC383 | Proliferation | TP53   | 0.49 | LoF | p.E285V       | Missense               | known     |
| CC385 | Mesenchymal   | KRAS   | 0.17 | Act | p.Q61H        | Missense               | known     |
| CC387 | Mesenchymal   | ARID1A | 0.07 | LoF | p.S711*       | Nonsense               | predicted |
| CC389 | Mesenchymal   | KRAS   | 0.16 | Act | p.G12A        | Missense               | known     |
| CC391 | Mesenchymal   | KRAS   | 0.08 | Act | p.G12D        | Missense               | known     |
| CC393 | Mesenchymal   | APC    | 0.46 | LoF | p.R2505Q      | Missense               | predicted |
| CC411 | Proliferation | ARID1A | 0.27 | LoF | p.M923Hfs*13  | Frameshift             | predicted |
| CC411 | Proliferation | ASXL1  | 0.29 | LoF | p.G645Vfs*58  | Frameshift             | predicted |
| CC411 | Proliferation | BAP1   | 0.32 | LoF | p.E200K       | Missense               | predicted |
| CC411 | Proliferation | BAP1   | 0.30 | LoF | p.Q280*       | Nonsense               | predicted |
| CC411 | Proliferation | EGFR   | 0.23 | Act | p.R451C       | Missense               | known     |
| CC411 | Proliferation | EPHA2  | 0.47 | LoF | p.G391R       | Missense               | known     |
| CC411 | Proliferation | ERBB2  | 0.34 | Act | p.V842I       | Missense               | known     |
| CC411 | Proliferation | GNAS   | 0.38 | Act | p.R201H       | Missense               | known     |

|       |               |        |      |     |               |                         |           |
|-------|---------------|--------|------|-----|---------------|-------------------------|-----------|
| CC411 | Proliferation | KRAS   | 0.29 | Act | p.D33E        | Missense                | known     |
| CC411 | Proliferation | MSH2   | 0.43 | LoF | p.L414Hfs*24  | Frameshift              | predicted |
| CC411 | Proliferation | MSH2   | 0.16 | LoF | p.G174Mfs*33  | Frameshift              | predicted |
| CC411 | Proliferation | MSH3   | 0.66 | LoF | p.K383Rfs*32  | Frameshift              | predicted |
| CC411 | Proliferation | SF3B1  | 0.47 | Act | p.G640S       | Missense                | predicted |
| CC411 | Proliferation | SMAD4  | 0.61 | LoF | p.R361H       | Missense                | known     |
| CC435 | Metabolic     | ARID1B | 0.27 | LoF | p.H1387Tfs*61 | Frameshift              | predicted |
| CC435 | Metabolic     | CDKN2A | 0.23 | LoF | p.E69Afs*50   | Frameshift              | predicted |
| CC435 | Metabolic     | ELF3   | 0.11 | LoF | p.R339W       | Missense                | predicted |
| CC435 | Metabolic     | EPHA2  | 0.18 | LoF | p.Q352Sfs*29  | Frameshift              | predicted |
| CC441 | Proliferation | ACVR2A | 0.18 | LoF | p.K437Rfs*5   | Frameshift              | predicted |
| CC441 | Proliferation | KRAS   | 0.25 | Act | p.Q61H        | Missense                | known     |
| CC445 | Proliferation | KRAS   | 0.30 | Act | p.G12C        | Missense                | known     |
| CC445 | Proliferation | TP53   | 0.17 | LoF | p.I232N       | Missense                | predicted |
| CC451 | Mesenchymal   | CDKN2A | 0.10 | LoF | p.G111Pfs*8   | Frameshift              | predicted |
| CC451 | Mesenchymal   | TP53   | 0.15 | LoF | p.E285K       | Missense                | known     |
| CC453 | Mesenchymal   | KRAS   | 0.14 | Act | p.G12D        | Missense                | known     |
| CC453 | Mesenchymal   | NF1    | 0.26 | LoF | .             | SpliceAcceptorInsertion | predicted |
| CC459 | Mesenchymal   | PIK3CA | 0.06 | Act | p.E707K       | Missense                | predicted |
| CC461 | Mesenchymal   | EPHA2  | 0.08 | LoF | p.A316Gfs*65  | Frameshift              | predicted |
| CC465 | Mesenchymal   | ACVR2A | 0.41 | LoF | p.K437Rfs*5   | Frameshift              | predicted |
| CC465 | Mesenchymal   | ARID1A | 0.19 | LoF | p.D1850Tfs*33 | Frameshift              | predicted |
| CC465 | Mesenchymal   | ARID1A | 0.18 | LoF | p.S366Afs*25  | Frameshift              | predicted |
| CC465 | Mesenchymal   | ATM    | 0.20 | LoF | .             | SpliceDonorSNV          | predicted |
| CC465 | Mesenchymal   | CDKN2A | 0.40 | LoF | p.R80*        | Nonsense                | known     |
| CC465 | Mesenchymal   | TGFBR2 | 0.25 | LoF | p.K153Afs*3   | Frameshift              | predicted |
| CC465 | Mesenchymal   | TP53   | 0.34 | LoF | p.R213*       | Nonsense                | known     |
| CC469 | Metabolic     | KRAS   | 0.22 | Act | p.G12V        | Missense                | known     |
| CC469 | Metabolic     | TP53   | 0.22 | LoF | p.R248W       | Missense                | known     |
| CC473 | Mesenchymal   | KRAS   | 0.17 | Act | p.G12D        | Missense                | known     |
| CC475 | Mesenchymal   | CDKN1B | 0.11 | LoF | p.A115Gfs*9   | Frameshift              | predicted |
| CC475 | Mesenchymal   | CDKN1B | 0.10 | LoF | p.S112Tfs*11  | Frameshift              | predicted |
| CC475 | Mesenchymal   | NF1    | 0.13 | LoF | p.E649Dfs*39  | Frameshift              | predicted |
| CC475 | Mesenchymal   | TP53   | 0.07 | LoF | p.G245D       | Missense                | known     |
| CC477 | Mesenchymal   | KRAS   | 0.33 | Act | p.G12A        | Missense                | known     |
| CC477 | Mesenchymal   | NF1    | 0.55 | LoF | .             | SpliceDonorSNV          | predicted |
| CC477 | Mesenchymal   | SMAD4  | 0.29 | LoF | p.R361H       | Missense                | known     |
| CC485 | Metabolic     | BRAF   | 0.08 | Act | p.D594G       | Missense                | known     |
| CC485 | Metabolic     | TP53   | 0.12 | LoF | p.R248Q       | Missense                | known     |
| CC489 | Proliferation | SF3B1  | 0.13 | Act | p.K700E       | Missense                | known     |
| CC489 | Proliferation | SMAD4  | 0.06 | LoF | p.A406T       | Missense                | predicted |
| CC491 | Mesenchymal   | ASXL1  | 0.12 | LoF | p.E518*       | Nonsense                | predicted |
| CC491 | Mesenchymal   | BAP1   | 0.22 | LoF | p.R237C       | Missense                | predicted |
| CC491 | Mesenchymal   | KRAS   | 0.29 | Act | p.G12A        | Missense                | known     |
| CC495 | Metabolic     | ARID1A | 0.20 | LoF | p.P1115Rfs*7  | Frameshift              | predicted |
| CC495 | Metabolic     | NF1    | 0.14 | LoF | p.W561C       | Missense                | predicted |
| CC495 | Metabolic     | TP53   | 0.10 | LoF | p.E171G       | Missense                | predicted |
| CC499 | Immune        | ACVR2A | 0.10 | LoF | p.K437Rfs*5   | Frameshift              | predicted |
| CC499 | Immune        | ARAF   | 0.10 | Act | p.R411W       | Missense                | predicted |
| CC499 | Immune        | ARID1B | 0.06 | LoF | p.R1519H      | Missense                | predicted |
| CC499 | Immune        | EPHA2  | 0.09 | LoF | p.P460Rfs*33  | Frameshift              | predicted |
| CC499 | Immune        | KRAS   | 0.08 | Act | p.V14I        | Missense                | known     |
| CC499 | Immune        | MSH2   | 0.20 | LoF | p.V606Sfs*29  | Frameshift              | predicted |
| CC499 | Immune        | MSH6   | 0.07 | LoF | p.F1088Sfs*2  | Frameshift              | known     |
| CC499 | Immune        | RNF43  | 0.10 | LoF | p.G659Vfs*41  | Frameshift              | predicted |
| CC499 | Immune        | RNF43  | 0.07 | LoF | p.R113*       | Nonsense                | predicted |
| CC499 | Immune        | TP53   | 0.06 | LoF | p.R273C       | Missense                | known     |
| CC501 | Mesenchymal   | ARID1A | 0.38 | LoF | p.S334*       | Nonsense                | predicted |
| CC501 | Mesenchymal   | ARID1A | 0.28 | LoF | p.E1531*      | Nonsense                | predicted |
| CC501 | Mesenchymal   | ARID1B | 0.32 | LoF | p.R1102*      | Nonsense                | predicted |
| CC501 | Mesenchymal   | ARID2  | 0.56 | LoF | p.E98K        | Missense                | predicted |
| CC501 | Mesenchymal   | CDKN2A | 0.45 | LoF | p.D84N        | Missense                | known     |
| CC501 | Mesenchymal   | ELF3   | 0.37 | LoF | p.Y352Sfs*96  | Frameshift              | predicted |
| CC501 | Mesenchymal   | SMAD4  | 0.34 | LoF | p.I326Lfs*10  | Frameshift              | predicted |
| CC501 | Mesenchymal   | TP53   | 0.60 | LoF | p.R110H       | Missense                | known     |
| CC503 | Mesenchymal   | DDR2   | 0.07 | Act | p.R165W       | Missense                | predicted |

|       |               |               |      |     |               |                     |           |
|-------|---------------|---------------|------|-----|---------------|---------------------|-----------|
| CC503 | Mesenchymal   | <i>ERBB2</i>  | 0.46 | Act | p.I654V       | Missense            | known     |
| CC503 | Mesenchymal   | <i>TP53</i>   | 0.06 | LoF | p.C242Y       | Missense            | known     |
| CC507 | Mesenchymal   | <i>BRAF</i>   | 0.13 | Act | p.R726H       | Missense            | predicted |
| CC507 | Mesenchymal   | <i>CDKN2A</i> | 0.31 | LoF | p.R80*        | Nonsense            | known     |
| CC509 | Proliferation | <i>KRAS</i>   | 0.40 | Act | p.G12D        | Missense            | known     |
| CC509 | Proliferation | <i>PIK3CA</i> | 0.70 | Act | p.E545G       | Missense            | known     |
| CC515 | Metabolic     | <i>ARID1A</i> | 0.09 | LoF | p.F1859Lfs*40 | Frameshift          | predicted |
| CC525 | Mesenchymal   | <i>ELF3</i>   | 0.69 | LoF | p.M49Nfs*43   | Frameshift          | predicted |
| CC525 | Mesenchymal   | <i>KRAS</i>   | 0.20 | Act | p.G12S        | Missense            | known     |
| CC525 | Mesenchymal   | <i>RB1</i>    | 0.13 | LoF | p.R661W       | Missense            | known     |
| CC525 | Mesenchymal   | <i>TP53</i>   | 0.21 | LoF | p.Q144Afs*4   | Frameshift          | predicted |
| CC527 | Mesenchymal   | <i>KRAS</i>   | 0.06 | Act | p.G12V        | Missense            | known     |
| CC529 | Immune        | <i>EPHA2</i>  | 0.14 | LoF | p.E403*       | Nonsense            | predicted |
| CC529 | Immune        | <i>KRAS</i>   | 0.08 | Act | p.G12V        | Missense            | known     |
| CC529 | Immune        | <i>TGFBR2</i> | 0.10 | LoF | p.P154Afs*3   | Frameshift          | predicted |
| CC529 | Immune        | <i>TP53</i>   | 0.11 | LoF | p.G105R       | Missense            | predicted |
| CC531 | Mesenchymal   | <i>IDH1</i>   | 0.08 | Act | p.R132H       | Missense            | known     |
| CC533 | Immune        | <i>IDH1</i>   | 0.47 | Act | p.R314G       | Missense            | predicted |
| CC533 | Immune        | <i>KRAS</i>   | 0.16 | Act | p.G12V        | Missense            | known     |
| CC533 | Immune        | <i>STK11</i>  | 0.17 | LoF | p.D194V       | Missense            | known     |
| CC535 | Proliferation | <i>TP53</i>   | 0.07 | LoF | p.R273H       | Missense            | known     |
| CC539 | Proliferation | <i>ARID1A</i> | 0.05 | LoF | p.H688Afs*129 | Frameshift          | predicted |
| CC541 | Proliferation | <i>ACVR2A</i> | 0.48 | LoF | p.K437Rfs*5   | Frameshift          | predicted |
| CC541 | Proliferation | <i>APC</i>    | 0.29 | LoF | p.Q1529*      | Nonsense            | predicted |
| CC541 | Proliferation | <i>ARID2</i>  | 0.06 | LoF | p.R143C       | Missense            | predicted |
| CC541 | Proliferation | <i>ELF3</i>   | 0.17 | LoF | .             | SpliceDonorDeletion | predicted |
| CC541 | Proliferation | <i>FBXW7</i>  | 0.21 | LoF | p.S668Vfs*39  | Frameshift          | predicted |
| CC541 | Proliferation | <i>KRAS</i>   | 0.45 | Act | p.G12D        | Missense            | known     |
| CC541 | Proliferation | <i>MSH2</i>   | 0.39 | LoF | p.G548C       | Missense            | predicted |
| CC541 | Proliferation | <i>MSH6</i>   | 0.06 | LoF | p.F1088Lfs*5  | Frameshift          | known     |
| CC543 | Mesenchymal   | <i>ARID1A</i> | 0.13 | LoF | p.K997Nfs*42  | Frameshift          | predicted |
| CC545 | Metabolic     | <i>ARID1A</i> | 0.15 | LoF | p.Q1188*      | Nonsense            | predicted |
| CC545 | Metabolic     | <i>ELF3</i>   | 0.39 | LoF | p.S330R       | Missense            | predicted |
| CC545 | Metabolic     | <i>KRAS</i>   | 0.14 | Act | p.K5N         | Missense            | known     |
| CC547 | Proliferation | <i>KRAS</i>   | 0.10 | Act | p.G12V        | Missense            | known     |
| CC547 | Proliferation | <i>TP53</i>   | 0.18 | LoF | p.R280T       | Missense            | known     |
| CC549 | Immune        | <i>NF1</i>    | 0.05 | LoF | p.A2321Cfs*5  | Frameshift          | predicted |
| CC549 | Immune        | <i>SF3B1</i>  | 0.07 | Act | p.K700E       | Missense            | known     |
| CC549 | Immune        | <i>SMAD4</i>  | 0.08 | LoF | p.G89Dfs*5    | Frameshift          | predicted |
| CC553 | Immune        | <i>TP53</i>   | 0.25 | LoF | p.G266R       | Missense            | known     |
| CC555 | Immune        | <i>TP53</i>   | 0.10 | LoF | p.S241F       | Missense            | known     |
| CC557 | Mesenchymal   | <i>TP53</i>   | 0.26 | LoF | p.C277Lfs*67  | Frameshift          | predicted |
| CC561 | Mesenchymal   | <i>EPHA2</i>  | 0.43 | LoF | p.G391R       | Missense            | known     |
| CC561 | Mesenchymal   | <i>KRAS</i>   | 0.17 | Act | p.G12R        | Missense            | known     |
| CC561 | Mesenchymal   | <i>TGFBR2</i> | 0.08 | LoF | p.Y495*       | Nonsense            | predicted |
| CC561 | Mesenchymal   | <i>TGFBR2</i> | 0.08 | LoF | p.K493lfs*2   | Frameshift          | predicted |
| CC561 | Mesenchymal   | <i>TGFBR2</i> | 0.07 | LoF | p.Y495S       | Missense            | predicted |
| CC565 | Proliferation | <i>KRAS</i>   | 0.48 | Act | p.G12D        | Missense            | known     |
| CC565 | Proliferation | <i>SMAD4</i>  | 0.73 | LoF | p.D351H       | Missense            | known     |
| CC567 | Immune        | <i>CDKN2A</i> | 0.24 | LoF | p.Y129*       | Nonsense            | predicted |
| CC567 | Immune        | <i>TP53</i>   | 0.16 | LoF | p.A138P       | Missense            | known     |
| CC569 | Proliferation | <i>CDKN2A</i> | 0.40 | LoF | p.E69*        | Nonsense            | known     |
| CC569 | Proliferation | <i>EPHA2</i>  | 0.52 | LoF | p.G391R       | Missense            | known     |
| CC569 | Proliferation | <i>TP53</i>   | 0.29 | LoF | p.R280K       | Missense            | known     |
| CC571 | Proliferation | <i>ARID1A</i> | 0.06 | LoF | p.Q1519Pfs*13 | Frameshift          | predicted |
| CC571 | Proliferation | <i>ATM</i>    | 0.55 | LoF | p.Y2677Lfs*5  | Frameshift          | predicted |
| CC571 | Proliferation | <i>NCOR1</i>  | 0.52 | LoF | p.R1628H      | Missense            | predicted |
| CC573 | Mesenchymal   | <i>ARID1B</i> | 0.15 | LoF | p.R1990*      | Nonsense            | predicted |
| CC573 | Mesenchymal   | <i>TP53</i>   | 0.12 | LoF | p.R248W       | Missense            | known     |
| CC577 | Mesenchymal   | <i>PIK3CA</i> | 0.06 | Act | p.E707K       | Missense            | predicted |
| CC579 | Mesenchymal   | <i>KRAS</i>   | 0.29 | Act | p.Q61H        | Missense            | known     |
| CC579 | Mesenchymal   | <i>PBRM1</i>  | 0.32 | LoF | p.Q779Pfs*13  | Frameshift          | predicted |
| CC579 | Mesenchymal   | <i>TP53</i>   | 0.25 | LoF | p.H179P       | Missense            | predicted |
| CC581 | Mesenchymal   | <i>CTNNB1</i> | 0.17 | Act | p.R565C       | Missense            | predicted |
| CC583 | Mesenchymal   | <i>KRAS</i>   | 0.06 | Act | p.G12D        | Missense            | known     |
| CC583 | Mesenchymal   | <i>TP53</i>   | 0.11 | LoF | p.G245S       | Missense            | known     |

|       |             |               |      |     |               |                |           |
|-------|-------------|---------------|------|-----|---------------|----------------|-----------|
| CC585 | Mesenchymal | <i>ARID1A</i> | 0.41 | LoF | p.Q601*       | Nonsense       | predicted |
| CC585 | Mesenchymal | <i>ATM</i>    | 0.27 | LoF | .             | SpliceDonorSNV | predicted |
| CC585 | Mesenchymal | <i>ATM</i>    | 0.19 | LoF | p.P2699L      | Missense       | predicted |
| CC585 | Mesenchymal | <i>ELF3</i>   | 0.27 | LoF | p.S266Kfs*35  | Frameshift     | predicted |
| CC585 | Mesenchymal | <i>EPHA2</i>  | 0.56 | LoF | p.E387Sfs*6   | Frameshift     | predicted |
| CC585 | Mesenchymal | <i>PIK3CA</i> | 0.10 | Act | p.E707K       | Missense       | predicted |
| CC585 | Mesenchymal | <i>TP53</i>   | 0.45 | LoF | p.F134L       | Missense       | predicted |
| CC591 | Mesenchymal | <i>KRAS</i>   | 0.13 | Act | p.G12V        | Missense       | known     |
| CC591 | Mesenchymal | <i>SF3B1</i>  | 0.06 | Act | p.K700E       | Missense       | known     |
| CC593 | Mesenchymal | <i>ARID1A</i> | 0.20 | LoF | p.K1072Nfs*21 | Frameshift     | predicted |
| CC593 | Mesenchymal | <i>KRAS</i>   | 0.17 | Act | p.G13D        | Missense       | known     |
| CC593 | Mesenchymal | <i>MSH6</i>   | 0.12 | LoF | p.E221*       | Nonsense       | predicted |
| CC593 | Mesenchymal | <i>NF1</i>    | 0.13 | LoF | p.R1968*      | Nonsense       | predicted |
| CC593 | Mesenchymal | <i>RNF43</i>  | 0.19 | LoF | p.G659Vfs*41  | Frameshift     | predicted |
| CC593 | Mesenchymal | <i>TP53</i>   | 0.14 | LoF | p.R248Q       | Missense       | known     |
| CC595 | Mesenchymal | <i>KRAS</i>   | 0.09 | Act | p.G12D        | Missense       | known     |
| CC595 | Mesenchymal | <i>TP53</i>   | 0.10 | LoF | p.R175H       | Missense       | known     |
| CC599 | Mesenchymal | <i>FBXW7</i>  | 0.12 | LoF | p.D607Y       | Missense       | predicted |
| CC601 | Mesenchymal | <i>APC</i>    | 0.11 | LoF | p.T1556Nfs*3  | Frameshift     | predicted |
| CC601 | Mesenchymal | <i>ELF3</i>   | 0.12 | LoF | p.F303Lfs*167 | Frameshift     | predicted |
| CC601 | Mesenchymal | <i>PIK3R1</i> | 0.19 | LoF | p.T500Dfs*14  | Frameshift     | predicted |
| CC601 | Mesenchymal | <i>RB1</i>    | 0.33 | LoF | p.A74Efs*4    | Frameshift     | predicted |
| CC601 | Mesenchymal | <i>TP53</i>   | 0.18 | LoF | .             | SpliceDonorSNV | known     |
| CC603 | Immune      | <i>APC</i>    | 0.20 | LoF | p.Y956*       | Nonsense       | predicted |
| CC603 | Immune      | <i>APC</i>    | 0.14 | LoF | p.T1556Nfs*3  | Frameshift     | predicted |
| CC603 | Immune      | <i>ARID2</i>  | 0.13 | LoF | p.Q329Pfs*2   | Frameshift     | predicted |
| CC603 | Immune      | <i>PIK3CA</i> | 0.21 | Act | p.E81K        | Missense       | known     |
| CC603 | Immune      | <i>PIK3CA</i> | 0.11 | Act | p.N345S       | Missense       | predicted |

Candidate mutations were the ones already known to be oncogenic as well as the predicted drivers in Tier 1 according to Cancer Genome Interpreter.



**Supplementary Table 4. Copy number alterations identified in eCCA.**

| <b>Sample</b> | <b>Class</b>  | <b>Gene</b>   | <b>Copy number</b> |
|---------------|---------------|---------------|--------------------|
| CC275         | Metabolic     | <i>CCND3</i>  | 10                 |
| CC239         | Immune        | <i>CCNE1</i>  | 13.5               |
| CC495         | Metabolic     | <i>CCNE1</i>  | 6                  |
| CC525         | Mesenchymal   | <i>CCNE1</i>  | 18                 |
| CC557         | Mesenchymal   | <i>CCNE1</i>  | 6                  |
| CC383         | Proliferation | <i>CD4</i>    | 13.5               |
| CC581         | Mesenchymal   | <i>CD4</i>    | 7                  |
| CC567         | Immune        | <i>EGFR</i>   | 7.5                |
| CC165         | Proliferation | <i>ERBB2</i>  | 15.5               |
| CC569         | Proliferation | <i>ERBB2</i>  | 32.5               |
| CC155         | NA            | <i>MDM2</i>   | 6.5                |
| CC171         | Mesenchymal   | <i>MDM2</i>   | 20.5               |
| CC189         | Immune        | <i>MDM2</i>   | 16                 |
| CC191         | Mesenchymal   | <i>MDM2</i>   | 11                 |
| CC239         | Immune        | <i>MDM2</i>   | 9                  |
| CC563         | Proliferation | <i>MDM2</i>   | 12.5               |
| CC581         | Mesenchymal   | <i>MDM2</i>   | 12                 |
| CC383         | Proliferation | <i>MYC</i>    | 9.5                |
| CC137         | Immune        | <i>YEATS4</i> | 8.5                |
| CC155         | NA            | <i>YEATS4</i> | 6.5                |
| CC171         | Mesenchymal   | <i>YEATS4</i> | 20.5               |
| CC189         | Immune        | <i>YEATS4</i> | 16                 |
| CC191         | Mesenchymal   | <i>YEATS4</i> | 11                 |
| CC237         | Immune        | <i>YEATS4</i> | 6                  |
| CC239         | Immune        | <i>YEATS4</i> | 7                  |
| CC563         | Proliferation | <i>YEATS4</i> | 12.5               |
| CC581         | Mesenchymal   | <i>YEATS4</i> | 21                 |

Copy number alterations were inferred from targeted DNA-sequencing panel using the multifactor normalization tool ONCOCNV. Focal amplifications were called at segments with  $\geq 6$  copies.

**Supplementary Table 5. Prognosis of structural genetic alterations.**

| Structural genetic alteration | Frequency in eCCA (%) | HR    | 95% CI |       | p value |
|-------------------------------|-----------------------|-------|--------|-------|---------|
|                               |                       |       | Lower  | Upper |         |
| <i>KRAS</i>                   | 36.7                  | 1.298 | 0.747  | 2.253 | 0.355   |
| <i>TP53</i>                   | 34.7                  | 1.723 | 1.010  | 2.938 | 0.046   |
| <i>ARID1A</i>                 | 14                    | 1.503 | 0.727  | 3.107 | 0.271   |
| <i>SMAD4</i>                  | 10.7                  | 1.262 | 0.567  | 2.811 | 0.568   |
| <i>EPHA2</i>                  | 10                    | 0.721 | 0.275  | 1.889 | 0.506   |
| <i>CDKN2A</i>                 | 9.3                   | 0.492 | 0.153  | 1.585 | 0.235   |
| <i>ELF3</i>                   | 7.3                   | 1.815 | 0.761  | 4.331 | 0.179   |
| <i>SF3B1</i>                  | 6                     | 0.357 | 0.086  | 1.479 | 0.156   |
| <i>YEATS4</i>                 | 6                     | 0.209 | 0.029  | 1.520 | 0.122   |
| <i>ATM</i>                    | 5.3                   | 1.335 | 0.321  | 5.554 | 0.691   |
| <i>ERBB2</i>                  | 5.3                   | 0.494 | 0.151  | 1.614 | 0.243   |
| <i>PIK3CA</i>                 | 5.3                   | 2.336 | 0.994  | 5.488 | 0.052   |
| <i>RNF43</i>                  | 5.3                   | 0.934 | 0.291  | 2.998 | 0.908   |

Cox regression for overall survival (OS) of mutations / amplifications that were present in >5% of eCCA tumors. OS was defined as the time between surgical resection and death of any cause or lost follow-up.

**Supplementary Table 6. Targeted therapies and their clinical evidence for the treatment of eCCA.**

| OncoKB                                                                                                                                                                              | Drug                                                                | Target    | Neoplasm (ORR in drugs tested in BTC) | Trial     | Biomarker (% in eCCA)      |
|-------------------------------------------------------------------------------------------------------------------------------------------------------------------------------------|---------------------------------------------------------------------|-----------|---------------------------------------|-----------|----------------------------|
| <b>Level 1</b> (FDA-recognized biomarker predictive of response to an FDA- approved drug in this indication)                                                                        | Pembrolizumab (Le et al.)                                           | PD-1      | CCA (1/1)                             | Basket    | MMR deficiency (2.0%)*     |
| <b>Level 2B</b> (Standard care biomarker predictive of response to an FDA- approved drug in another indication but not standard care for this indication)                           | Rucaparib/Niraparib/Olaparib/Talazoparib                            | PARP      | Ovarian/Breast                        | Phase 3   | BRCA1/2 mut (2.7%)         |
|                                                                                                                                                                                     | Afatinib/Erlotinib/Gefitinib/Osimertinib/Dacomitinib                | EGFR      | NSCLC                                 | Phase 3   | EGFR mut (0.7%)            |
|                                                                                                                                                                                     | Trastuzumab/Lapatinib/Pertuzumab/Neratinib                          | HER2      | Breast/Gastric                        | Phase 3   | HER2 overexpression (3.9%) |
|                                                                                                                                                                                     | Abemaciclib/Palbociclib                                             | CDK4/6    | Liposarcoma                           | Phase 2   | CDK4 amp (1.3%)            |
|                                                                                                                                                                                     | Enasidenib                                                          | IDH2      | Leukemia                              | Phase 1/2 | IDH2 mut (2.7%)            |
| <b>Level 3A</b> (Compelling clinical evidence supports the biomarker as being predictive of response to a drug in this indication, but neither biomarker nor drug is standard care) | Neratinib (Hyman et al.)                                            | HER2/EGFR | BTC (2/9)                             | Basket    | HER2 mut (4.0%)            |
|                                                                                                                                                                                     | EGFR inhibitor (Verlingue et al.)                                   | EGFR      | BTC (1/1)                             | Basket    | EGFR amp (0.7%)            |
|                                                                                                                                                                                     | Trastuzumab (Verlingue et al.)                                      | HER2      | GBC (1/1)                             | Basket    | HER2 amp (1.3%)            |
|                                                                                                                                                                                     | Ivosidenib (Lowery et al.)                                          | IDH1      | CCA (4/73)                            | Phase 1   | IDH1 mut (2.0%)            |
|                                                                                                                                                                                     | Vemurafenib (Hyman et al.)                                          | BRAF      | CCA (1/8)                             | Basket    | BRAF mutation (2.0%)       |
| <b>Level 3B</b> (Compelling clinical evidence supports the biomarker as being predictive of response to a drug in another indication, but neither biomarker nor drug is             | Binimetinib                                                         | MEK       | Melanoma                              | Phase 3   | NRAS mut (0.7%)            |
|                                                                                                                                                                                     | Alpelisib, Buparlisib, Copanlisib, GDC-0077, Serabelisib, Taselisib | PIK3CA    | Breast                                | Phase 1   | PIK3CA mut (5.3%)          |
|                                                                                                                                                                                     | RG7112, DS-3032b                                                    | MDM2      | Liposarcoma                           | Phase 1/2 | MDM2 amp (4.7%)            |

Drug/biomarker pairs were categorized according to the OncoKB curated precision oncology knowledge base. The prevalence of each biomarker is based on the present study. \*Evaluated in samples with mutations in MMR genes. NSCLC: Non-small cell lung carcinoma.

**Supplementary Table 7. Risk factors and eCCA molecular classes.**

| Risk factor, n | eCCA molecular class |               |             |        |
|----------------|----------------------|---------------|-------------|--------|
|                | Metabolic            | Proliferation | Mesenchymal | Immune |
| Alcohol        | 2                    | 0             | 1           | 0      |
| Hepatitis B    | 0                    | 1             | 1           | 1      |
| Hepatitis C    | 0                    | 0             | 1           | 0      |
| NASH           | 0                    | 0             | 1           | 0      |
| PSC            | 1                    | 1             | 4           | 0      |

Distribution of known eCCA risk factors in each molecular class.

**Supplementary Table 8. Upstream regulators of the transcriptome-based eCCA molecular classes.**

|                      | Upstream Regulator                        | Molecule Type                     | Activation z-score | p value of overlap |
|----------------------|-------------------------------------------|-----------------------------------|--------------------|--------------------|
| <b>Metabolic</b>     | HNF4A                                     | transcription regulator           | 6.125              | 1.24E-38           |
|                      | HNF1A                                     | transcription regulator           | 5.712              | 6.15E-37           |
|                      | CEBPA                                     | transcription regulator           | 3.814              | 5.11E-14           |
|                      | PXR ligand-PXR-Retinoic acid-RXR $\alpha$ | complex                           | 3.812              | 7.06E-13           |
|                      | PPARG                                     | ligand-dependent nuclear receptor | 3.749              | 1.5E-11            |
|                      | PPARGC1A                                  | transcription regulator           | 3.709              | 6.56E-11           |
|                      | PKD1                                      | ion channel                       | 3.362              | 0.00000175         |
|                      | FXR ligand-FXR-Retinoic acid-RXR $\alpha$ | complex                           | 3.062              | 1.35E-13           |
|                      | Ncoa-Nr1i3-Rxra                           | complex                           | 3                  | 1.36E-09           |
|                      | FOXA2                                     | transcription regulator           | 2.996              | 1.53E-13           |
| <b>Proliferation</b> | MYCN                                      | transcription regulator           | 6.14               | 7.67E-12           |
|                      | MYC                                       | transcription regulator           | 5.087              | 0.000224           |
|                      | EIF4E                                     | translation regulator             | 4.519              | 0.0219             |
|                      | GAST                                      | other                             | 3.467              | 0.0091             |
|                      | NFE2L2                                    | transcription regulator           | 3.394              | 0.0135             |
|                      | NLRC5                                     | transcription regulator           | 2.595              | 0.00359            |
|                      | TFEB                                      | transcription regulator           | 2.435              | 0.00689            |
|                      | HSF2                                      | transcription regulator           | 2.335              | 0.00565            |
|                      | p70 S6k                                   | group                             | 2.219              | 0.0109             |
|                      | ERBB2                                     | kinase                            | 2.184              | 0.0179             |
| <b>Mesenchymal</b>   | TGFB1                                     | growth factor                     | 3.309              | 0.000303           |
|                      | TNF                                       | cytokine                          | 3.148              | 0.00259            |
|                      | RICTOR                                    | other                             | 3.073              | 0.000224           |
|                      | CTNNB1                                    | transcription regulator           | 2.356              | 0.0000707          |
|                      | CD3                                       | complex                           | 2.356              | 0.000512           |
|                      | CD44                                      | other                             | 2.333              | 0.0315             |
|                      | ABCC8                                     | transporter                       | 2.216              | 0.000607           |
|                      | LRP6                                      | transmembrane receptor            | 1.98               | 0.00551            |
|                      | miR-23a-3p (and other miRNAs w/see)       | mature microRNA                   | 1.964              | 0.00977            |
|                      | ESR1                                      | ligand-dependent nuclear receptor | 1.883              | 0.00212            |
| <b>Immune</b>        | CST5                                      | other                             | 3.606              | 0.0402             |
|                      | RICTOR                                    | other                             | 3.582              | 0.029              |
|                      | IFNG                                      | cytokine                          | 3.069              | 0.00199            |
|                      | miR-124-3p (and other miRNAs w/see)       | mature microRNA                   | 2.783              | 0.00461            |
|                      | TGM2                                      | enzyme                            | 2.724              | 0.0453             |
|                      | BTNL2                                     | transmembrane receptor            | 2.449              | 0.0162             |
|                      | IL7R                                      | transmembrane receptor            | 2.433              | 0.0089             |
|                      | IKZF1                                     | transcription regulator           | 2.345              | 0.0121             |
|                      | SOX1                                      | transcription regulator           | 2.236              | 0.0483             |
| CD5                  | transmembrane receptor                    | 2.219                             | 0.0143             |                    |

Top 10 activated upstream regulators in the four eCCA molecular classes. Genes differentially expressed between molecular classes (FDR<0.01) were identified with the Comparative Marker Selection module from GenePattern. Ingenuity Pathway analysis software was used for the inference of putative upstream regulators explaining the observed gene expression changes among the identified molecular classes. The overlap

p-value measures whether there is a statistically significant overlap between the dataset genes and the genes that are regulated by a transcriptional regulator. It is calculated using Fisher's Exact Test. Activation z-score infer the activation states of predicted transcriptional regulators.

## Supplementary Table 9. Compounds potentially effective for each eCCA molecular class.

|                  | Compound                        | Description                                                                                                                                                         | Tau                                                                                                                                                                  |        |
|------------------|---------------------------------|---------------------------------------------------------------------------------------------------------------------------------------------------------------------|----------------------------------------------------------------------------------------------------------------------------------------------------------------------|--------|
| Metabolic        | GW-843682X                      | PLK inhibitor                                                                                                                                                       | -99.42                                                                                                                                                               |        |
|                  | tricinbine                      | AKT inhibitor                                                                                                                                                       | -99.25                                                                                                                                                               |        |
|                  | kinetin-riboside                | apoptosis inducer                                                                                                                                                   | -99.22                                                                                                                                                               |        |
|                  | vinorelbine                     | tubulin inhibitor, apoptosis stimulant, microtubule inhibitor, mitosis inhibitor, mitotic inhibitor, tubulin polymerisation inhibitor, vinca alkaloid               | -99.15                                                                                                                                                               |        |
|                  | MLN-4924                        | nedd activating enzyme inhibitor                                                                                                                                    | -99.06                                                                                                                                                               |        |
|                  | MST-312                         | telomerase inhibitor                                                                                                                                                | -98.97                                                                                                                                                               |        |
|                  | ABT-751                         | tubulin inhibitor, dihydropteroate synthase inhibitor, microtubule inhibitor, PABA antagonist, tubulin polymerisation inhibitor                                     | -98.44                                                                                                                                                               |        |
|                  | didanosine                      | nucleoside reverse transcriptase inhibitor, reverse transcriptase inhibitor                                                                                         | -98.42                                                                                                                                                               |        |
|                  | emeline                         | protein synthesis inhibitor                                                                                                                                         | -98.03                                                                                                                                                               |        |
|                  | MLN-2238                        | proteasome inhibitor                                                                                                                                                | -97.92                                                                                                                                                               |        |
|                  | nocodazole                      | tubulin inhibitor, Tubulin Polymerization Inhibitors                                                                                                                | -97.9                                                                                                                                                                |        |
|                  | prostratin                      | NFkB pathway activator, PKC activator                                                                                                                               | -97.69                                                                                                                                                               |        |
|                  | flubendazole                    | acetylcholinesterase inhibitor, microtubule inhibitor, tubulin inhibitor                                                                                            | -97.01                                                                                                                                                               |        |
|                  | ingenol                         | PKC activator                                                                                                                                                       | -96.9                                                                                                                                                                |        |
|                  | helveticoside                   | ATPase inhibitor                                                                                                                                                    | -96.85                                                                                                                                                               |        |
|                  | HU-211                          | glutamate receptor antagonist, apoptosis stimulant, NFkB pathway inhibitor, reducing agent                                                                          | -96.75                                                                                                                                                               |        |
|                  | NSC-632839                      | ubiquitin hydrolase inhibitor, ubiquitin isopeptidase inhibitor                                                                                                     | -96.24                                                                                                                                                               |        |
|                  | SA-63133                        | casein kinase inhibitor, tubulin inhibitor                                                                                                                          | -95.97                                                                                                                                                               |        |
|                  | ICI-204448                      | opioid receptor agonist                                                                                                                                             | -95.46                                                                                                                                                               |        |
|                  | vincristine                     | tubulin inhibitor, microtubule inhibitor, microtubule polymerization inhibitor, tubulin polymerisation inhibitor, vinca alkaloid                                    | -94.04                                                                                                                                                               |        |
|                  | VX-222                          | HCV inhibitor, RNA-directed RNA polymerase inhibitor                                                                                                                | -93.99                                                                                                                                                               |        |
|                  | LDN-193189                      | ALK inhibitor, serine/threonine protein kinase inhibitor                                                                                                            | -93.71                                                                                                                                                               |        |
|                  | lobeline                        | acetylcholine receptor antagonist, dopamine receptor modulator, opioid receptor antagonist, vesicular monoamine transporter ligand                                  | -93.56                                                                                                                                                               |        |
|                  | rifampicin                      | DNA directed RNA polymerase inhibitor, enzyme inducer                                                                                                               | -93.54                                                                                                                                                               |        |
|                  | LY-2183240                      | FAAH inhibitor, FAAH reuptake inhibitor                                                                                                                             | -93.4                                                                                                                                                                |        |
|                  | roxolitinib                     | JAK inhibitor, tyrosine kinase inhibitor                                                                                                                            | -93.03                                                                                                                                                               |        |
|                  | quinoclamine                    | algicide                                                                                                                                                            | -92.68                                                                                                                                                               |        |
|                  | phorbol-12-myristate-13-acetate | PKC activator, CD antagonist                                                                                                                                        | -92.54                                                                                                                                                               |        |
|                  | SA-792574                       | microtubule inhibitor, tubulin inhibitor                                                                                                                            | -92.32                                                                                                                                                               |        |
|                  | ciclacillin                     | cell wall synthesis inhibitor                                                                                                                                       | -90.52                                                                                                                                                               |        |
|                  | altanserin                      | serotonin receptor antagonist, collagen stimulant                                                                                                                   | -90.31                                                                                                                                                               |        |
|                  | 15-delta-prostaglandin-j2       | PPAR receptor agonist, FXR antagonist                                                                                                                               | -90.25                                                                                                                                                               |        |
|                  | Proliferation                   | calyculin                                                                                                                                                           | protein phosphatase inhibitor                                                                                                                                        | -99.27 |
|                  |                                 | W-12                                                                                                                                                                | calmodulin antagonist                                                                                                                                                | -98.07 |
|                  |                                 | narciclasine                                                                                                                                                        | cofilin signaling pathway activator, LIM kinase activator, ROCK activator                                                                                            | -97.81 |
|                  |                                 | dexbrompheniramine                                                                                                                                                  | histamine receptor antagonist                                                                                                                                        | -97.42 |
|                  |                                 | entinostat                                                                                                                                                          | HDAC inhibitor, cell cycle inhibitor                                                                                                                                 | -96.56 |
|                  |                                 | BI-2536                                                                                                                                                             | PLK inhibitor, apoptosis stimulant, cell cycle inhibitor, protein kinase inhibitor                                                                                   | -96.47 |
|                  |                                 | dihydroergocristine                                                                                                                                                 | adrenergic receptor antagonist, prolactin inhibitor, adrenergic receptor partial agonist, dopamine receptor agonist, dopamine receptor partial agonist, dopamine re  | -96.3  |
|                  |                                 | JWE-035                                                                                                                                                             | Aurora kinase inhibitor                                                                                                                                              | -95.53 |
|                  |                                 | quvinostat                                                                                                                                                          | HDAC inhibitor, interleukin receptor antagonist, interleukin synthesis inhibitor, tumor necrosis factor receptor antagonist, tumor necrosis factor release inhibitor | -95.33 |
| emeline          |                                 | protein synthesis inhibitor                                                                                                                                         | -94.86                                                                                                                                                               |        |
| belinostat       |                                 | HDAC inhibitor, cell cycle inhibitor                                                                                                                                | -94.65                                                                                                                                                               |        |
| NCH-51           |                                 | HDAC inhibitor                                                                                                                                                      | -94.63                                                                                                                                                               |        |
| cephaeline       |                                 | protein synthesis inhibitor                                                                                                                                         | -94.51                                                                                                                                                               |        |
| everolimus       |                                 | mTOR inhibitor, angiogenesis inhibitor, cell cycle inhibitor, immunosuppressant, protein kinase inhibitor, rotamase inhibitor                                       | -94.43                                                                                                                                                               |        |
| formoterol       |                                 | adrenergic receptor agonist                                                                                                                                         | -94.31                                                                                                                                                               |        |
| isoeugenol       |                                 | nitric oxide production inhibitor                                                                                                                                   | -93.57                                                                                                                                                               |        |
| AZD-7762         |                                 | CHK inhibitor                                                                                                                                                       | -92.92                                                                                                                                                               |        |
| tubaic-acid      |                                 | mitochondrial complex I inhibitor, NADH-ubiquinone oxidoreductase (Complex I) inhibitor                                                                             | -92.91                                                                                                                                                               |        |
| trichostatin-a   |                                 | HDAC inhibitor, CDK expression enhancer, ID1 expression inhibitor                                                                                                   | -92.9                                                                                                                                                                |        |
| erythrosine      |                                 | food coloring agent                                                                                                                                                 | -92.84                                                                                                                                                               |        |
| III606050        |                                 | cytochrome P450 inhibitor                                                                                                                                           | -92.84                                                                                                                                                               |        |
| puromycin        |                                 | adenosine receptor agonist, protein synthesis inhibitor                                                                                                             | -92.72                                                                                                                                                               |        |
| AR-A014418       |                                 | glycogen synthase kinase inhibitor                                                                                                                                  | -92.28                                                                                                                                                               |        |
| JNJ-7706621      |                                 | CDK inhibitor, Aurora kinase inhibitor                                                                                                                              | -92.12                                                                                                                                                               |        |
| mofezolac        |                                 | cyclooxygenase inhibitor, cytochrome P450 inhibitor, platelet aggregation inhibitor                                                                                 | -92.05                                                                                                                                                               |        |
| oxfendazole      |                                 | anthelmintic agent                                                                                                                                                  | -91.97                                                                                                                                                               |        |
| clobetasol       |                                 | glucocorticoid receptor agonist                                                                                                                                     | -91.93                                                                                                                                                               |        |
| canrenoic-acid   |                                 | aldosterone antagonist                                                                                                                                              | -91.93                                                                                                                                                               |        |
| dofetilide       |                                 | polarization inhibitor, potassium channel antagonist, potassium channel blocker                                                                                     | -91.9                                                                                                                                                                |        |
| cabergoline      |                                 | dopamine receptor agonist, prolactin inhibitor, prolactin secretion inhibitor                                                                                       | -91.85                                                                                                                                                               |        |
| ZSTK-474         |                                 | PI3K inhibitor                                                                                                                                                      | -91.85                                                                                                                                                               |        |
| L-655240         |                                 | platelet aggregation inhibitor, prostanoid receptor antagonist, thromboxane receptor antagonist                                                                     | -91.44                                                                                                                                                               |        |
| XMD-892          |                                 | MAP kinase inhibitor, BMK inhibitor, leucine rich repeat kinase inhibitor                                                                                           | -90.67                                                                                                                                                               |        |
| moclobemide      |                                 | monoamine oxidase inhibitor                                                                                                                                         | -90.66                                                                                                                                                               |        |
| linifanib        |                                 | PDGFR tyrosine kinase receptor inhibitor, VEGFR inhibitor, angiogenesis inhibitor, colony stimulating factor receptor antagonist, colony stimulating factor recepto | -90.61                                                                                                                                                               |        |
| remaemide        |                                 | glutamate receptor antagonist, glutamate receptor agonist                                                                                                           | -90.55                                                                                                                                                               |        |
| ZM-306416        |                                 | Src and Abl inhibitor, vascular endothelial growth factor receptor 1 (VEGFR1) inhibitor                                                                             | -90.44                                                                                                                                                               |        |
| etodolac         |                                 | cyclooxygenase inhibitor, TRPV agonist                                                                                                                              | -90.4                                                                                                                                                                |        |
| THM-L94          |                                 | HDAC inhibitor, apoptosis stimulant, cell cycle inhibitor                                                                                                           | -90.34                                                                                                                                                               |        |
| BRD-K83780220    |                                 | casein kinase inhibitor, FLT3 inhibitor                                                                                                                             | -90.25                                                                                                                                                               |        |
| parachlorophenol |                                 | disinfectant                                                                                                                                                        | -90.17                                                                                                                                                               |        |

|                              |                               |                                                                                                                                                                                                 |                                                           |        |
|------------------------------|-------------------------------|-------------------------------------------------------------------------------------------------------------------------------------------------------------------------------------------------|-----------------------------------------------------------|--------|
| Mesenchymal                  | SJ-172550                     | MDM inhibitor                                                                                                                                                                                   | -96.86                                                    |        |
|                              | AC-55649                      | RAR agonist, retinoid receptor agonist                                                                                                                                                          | -95.9                                                     |        |
|                              | estrone                       | estrogen receptor agonist, estrogenic hormone                                                                                                                                                   | -95.45                                                    |        |
|                              | methyl-2,5-dihydroxycinnamate | EGFR inhibitor, tyrosine kinase inhibitor                                                                                                                                                       | -94.96                                                    |        |
|                              | tyrphostin-AG-1295            | FLT3 inhibitor, PDGFR tyrosine kinase receptor inhibitor                                                                                                                                        | -94.04                                                    |        |
|                              | BAS-09104376                  | HIV integrase inhibitor                                                                                                                                                                         | -93.91                                                    |        |
|                              | fluciclonide                  | corticosteroid agonist, corticosteroid hormone receptor agonist                                                                                                                                 | -93.67                                                    |        |
|                              | baeomycetic-acid              | lipoxigenase inhibitor                                                                                                                                                                          | -92.7                                                     |        |
|                              | oxymetholone                  | androgen receptor agonist, synthetic hormone with anabolic and androgenic properties                                                                                                            | -92.7                                                     |        |
|                              | farnesol                      | amine oxidase B inhibitor, FXR agonist                                                                                                                                                          | -92.65                                                    |        |
|                              | diethyltoluamide              | DEET, activator of fly antenna ionotropic receptor IR40a                                                                                                                                        | -92.04                                                    |        |
|                              | lansoprazole                  | ATPase inhibitor                                                                                                                                                                                | -91.07                                                    |        |
|                              | linezolid                     | 50S ribosomal subunit inhibitor, protein synthesis inhibitor, monoamine oxidase inhibitor                                                                                                       | -90.97                                                    |        |
|                              | dexamethasone                 | glucocorticoid receptor agonist, corticosteroid agonist, immunosuppressant                                                                                                                      | -90.87                                                    |        |
|                              | PI-630                        | dipeptidyl peptidase inhibitor, fibroblast activation protein inhibitor                                                                                                                         | -90.29                                                    |        |
|                              | esomeprazole                  | ATPase inhibitor, ABC transporter expression enhancer                                                                                                                                           | -90.22                                                    |        |
|                              | Immune                        | panobinostat                                                                                                                                                                                    | HDAC inhibitor, apoptosis stimulant, cell cycle inhibitor | 98.87  |
|                              |                               | SJ-172550                                                                                                                                                                                       | MDM inhibitor                                             | -98.66 |
|                              |                               | rucaparib                                                                                                                                                                                       | PARP inhibitor                                            | -97.18 |
|                              |                               | doxylamine                                                                                                                                                                                      | histamine receptor antagonist                             | -97.06 |
| exemestane                   |                               | aromatase inhibitor                                                                                                                                                                             | -96.46                                                    |        |
| eugenol                      |                               | androgen receptor (AR) inhibitor, free radical scavenger, monoamine oxidase inhibitor, quorum sensing signaling modulator                                                                       | -96.23                                                    |        |
| CA-074-Me                    |                               | cathepsin inhibitor, antiamyloidogenic agent                                                                                                                                                    | -96.21                                                    |        |
| mupirocin                    |                               | isoleucyl-tRNA synthetase inhibitor                                                                                                                                                             | -96.14                                                    |        |
| deferiprone                  |                               | chelating agent, cytochrome P450 inhibitor, iron absorption inhibitor, reducing agent                                                                                                           | -96.01                                                    |        |
| NAS-181                      |                               | serotonin receptor antagonist                                                                                                                                                                   | -96                                                       |        |
| ST-91                        |                               | adrenergic receptor agonist                                                                                                                                                                     | -95.41                                                    |        |
| verapamil                    |                               | calcium channel blocker, L-type calcium channel blocker, dopamine receptor antagonist                                                                                                           | -95.31                                                    |        |
| mementine                    |                               | glutamate receptor antagonist, glutamate release inhibitor                                                                                                                                      | -95.08                                                    |        |
| topiramate                   |                               | carbonic anhydrase inhibitor, glutamate receptor antagonist, kainate receptor antagonist, GABA receptor agonist, Sodium Channel Blockers, voltage-gated sodium channel blocker                  | -95.03                                                    |        |
| ibudilast                    |                               | phosphodiesterase inhibitor, leukotriene receptor antagonist, toll-like receptor antagonist, macrophage migration inhibiting factor inhibitor, macrophage migration inhibitory factor inhibitor | -94.86                                                    |        |
| tienilic-acid                |                               | sodium/potassium/chloride transporter inhibitor, unc acid diuretic                                                                                                                              | -94.62                                                    |        |
| lysylphenylalaninyl-tyrosine |                               | heparin activation inhibitor                                                                                                                                                                    | -94.47                                                    |        |
| latripirdine                 |                               | glutamate receptor antagonist, histamine receptor antagonist, serotonin receptor antagonist                                                                                                     | -94.43                                                    |        |
| tyrphostin-AG-82             |                               | EGFR inhibitor, epidermal growth factor receptor (EGFR) inhibitor, tyrosine kinase inhibitor                                                                                                    | -94.41                                                    |        |
| epigallocatechin             |                               | AP inhibitor, aromatase inhibitor, bacterial efflux pump inhibitor, beta amyloid aggregation inhibitor, beta amyloid protein neurotoxicity inhibitor, beta secretase inhibitor                  | -94.38                                                    |        |
| amisulpride                  |                               | dopamine receptor antagonist                                                                                                                                                                    | -94.31                                                    |        |
| desoxypeganine               |                               | acetylcholinesterase inhibitor, monoamine oxidase inhibitor                                                                                                                                     | -93.98                                                    |        |
| cholic-acid                  |                               | ferrochelataze inhibitor, unidentified pharmacological activity                                                                                                                                 | -93                                                       |        |
| eugenitol                    |                               | androgen receptor (AR) inhibitor, free radical scavenger, monoamine oxidase inhibitor, quorum sensing signaling modulator                                                                       | -92.99                                                    |        |
| 3-amino-benzamide            |                               | PARP inhibitor                                                                                                                                                                                  | -92.94                                                    |        |
| fluoropyruvate               |                               | PDH inhibitor                                                                                                                                                                                   | -92.85                                                    |        |
| BRD-K21009077                |                               | dual specificity protein phosphatase inhibitors                                                                                                                                                 | -92.71                                                    |        |
| L-692585                     |                               | growth hormone releasing peptide ligand agonist, growth hormone secretagogue                                                                                                                    | -92.53                                                    |        |
| temozolomide                 |                               | DNA alkylating drug, DNA damage inducer, DNA inhibitor, topoisomerase inhibitor                                                                                                                 | -92.51                                                    |        |
| methylmethylhexanone         |                               | Aurora kinase inhibitor, Pim kinase inhibitor, VEGFR inhibitor                                                                                                                                  | -92.29                                                    |        |
| resveratrol                  |                               | apolipoprotein expression enhancer, beta-secretase inhibitor, cyclooxygenase inhibitor, cytochrome P450 inhibitor, lipid peroxidase inhibitor, MAP kinase inhibitor                             | -92.28                                                    |        |
| AC-55649                     |                               | RAR agonist, retinoid receptor agonist                                                                                                                                                          | -92.26                                                    |        |
| rifaximin                    |                               | 50S ribosomal subunit inhibitor, DNA directed DNA polymerase inhibitor, PXR agonist, RNA synthesis inhibitor                                                                                    | -92.24                                                    |        |
| probenecid                   |                               | MRP inhibitor, TRPV agonist, uricosuric blocker                                                                                                                                                 | -92.19                                                    |        |
| oxymetholone                 |                               | androgen receptor agonist, synthetic hormone with anabolic and androgenic properties                                                                                                            | -92.16                                                    |        |
| rilmenidine                  |                               | adrenergic receptor agonist, imidazoline receptor agonist                                                                                                                                       | -92.16                                                    |        |
| brinzolamide                 |                               | carbonic anhydrase inhibitor                                                                                                                                                                    | -92.03                                                    |        |
| piceid                       |                               | glucosidase inhibitor, ICAM1 expression inhibitor, VCAM expression inhibitor, xanthine oxidase inhibitor                                                                                        | -91.74                                                    |        |
| tomelukast                   |                               | leukotriene receptor antagonist                                                                                                                                                                 | -91.72                                                    |        |
| YM-298198                    |                               | glutamate receptor antagonist                                                                                                                                                                   | -91.52                                                    |        |
| BRD-K57954781                |                               | apoptosis stimulant, DNA inhibitor                                                                                                                                                              | -91.48                                                    |        |
| lonidamine                   |                               | glucokinase inhibitor, protein synthesis inhibitor                                                                                                                                              | -91.25                                                    |        |
| AM-404                       |                               | FAAH transport inhibitor, anandamide transport inhibitor, nuclear factor of activated T-cells inhibitor, TRPV agonist                                                                           | -91.13                                                    |        |
| valsartan                    |                               | angiotensin receptor antagonist                                                                                                                                                                 | -90.77                                                    |        |
| ritonavir                    |                               | HIV protease inhibitor, cytochrome P450 inhibitor                                                                                                                                               | -90.7                                                     |        |
| zacopride                    |                               | serotonin receptor antagonist, serotonin receptor agonist                                                                                                                                       | -90.62                                                    |        |
| sitagliptin                  |                               | dipeptidyl peptidase inhibitor, HMGCR inhibitor, insulin secretagogue, tumor necrosis factor expression inhibitor                                                                               | -90.57                                                    |        |
| nicotine                     |                               | acetylcholine receptor agonist                                                                                                                                                                  | -90.28                                                    |        |
| valproic-acid                |                               | HDAC inhibitor, ABAT inhibitor, GABA receptor agonist, GABAergic transmission enhancer, voltage-gated sodium channel blocker                                                                    | -90.07                                                    |        |
| methanetheline               |                               | acetylcholine receptor antagonist                                                                                                                                                               | -90.06                                                    |        |

Top up-regulated genes in each eCCA molecular class were used to identify perturbations (treatments with 2837 small molecules in 9 cancer cell lines)[38] that elicit opposed expression signatures (tau < -90). A tau of -90 indicates that only 10% of reference perturbations were more dissimilar to the query.



**Supplementary Table 10. Prognostic factors in terms of overall survival in eCCA.**

|                                                     | Univariate       |         | Multivariate     |         |
|-----------------------------------------------------|------------------|---------|------------------|---------|
|                                                     | HR (95% CI)      | p value | HR (95% CI)      | p value |
| <b>Gender</b> (male vs female)                      | 1.74 (0.98-3.07) | 0.058   |                  |         |
| <b>Age</b> (>65 years)                              | 1.21 (0.73-2.01) | 0.564   |                  |         |
| <b>Anatomical subtype</b> (perihilar vs distal)     | 1.16 (0.59-2.25) | 0.669   |                  |         |
| <b>Tumor diameter</b> (>25mm)                       | 1.09 (0.63-1.88) | 0.759   |                  |         |
| <b>Pathological lymph nodes</b> (present vs absent) | 1.66 (0.95-2.90) | 0.072   |                  |         |
| <b>Resection margins</b> (R1 vs R0)                 | 1.84 (1.05-3.22) | 0.034   |                  | 0.154   |
| <b>Bilirubin</b> (>3.3mg/dl)                        | 1.18 (0.69-2.00) | 0.551   |                  |         |
| <b>ALT</b> (>99U/l)                                 | 1.38 (0.80-2.36) | 0.244   |                  |         |
| <b>Albumin</b> (>37mg/dl)                           | 0.77 (0.43-1.37) | 0.369   |                  |         |
| <b>CA19.9</b> (>142U/l)                             | 1.48 (0.79-2.76) | 0.220   |                  |         |
| <b>CEA</b> (>2.4ng/ml)                              | 1.52 (0.75-3.07) | 0.244   |                  |         |
| <b>Cell differentiation</b> (G3/G4 vs G1/G2)        | 2.84 (1.36-5.92) | 0.005   | 3.04 (1.38-6.69) | 0.006   |
| <b>Perineural invasion</b> (present vs absent)      | 1.39 (0.82-2.37) | 0.226   |                  |         |
| <b>Vascular invasion</b> (present vs absent)        | 1.09 (0.54-2.23) | 0.805   |                  |         |
| <b>Molecular class</b> (mesenchymal vs rest)        | 1.85 (1.07-3.17) | 0.027   | 1.95 (1.12-3.40) | 0.018   |

Variables with  $p < 0.05$  in the univariate analysis were subsequently introduced in the stepwise multivariate model using Cox regression. Overall survival was defined as the time between surgical resection and death of any cause or lost follow-up. Patients with less than one month of follow-up ( $n=24$ ) were excluded from the analysis of prognostic factors in order to minimize the effect of surgical complications as a determinant of clinical outcome.

**Supplementary Table 11. eCCA classifier containing 174 genes.**

| Gene          |           |
|---------------|-----------|
| Metabolic     | ORM1      |
|               | FGA       |
|               | ALB       |
|               | HP        |
|               | APOA2     |
|               | AGT       |
|               | ITIH3     |
|               | ITIH2     |
|               | SERPINA6  |
|               | ITIH4     |
|               | FGG       |
|               | PCK1      |
|               | VTN       |
|               | SLC25A47  |
|               | FGB       |
|               | AZGP1     |
|               | SERPINA1  |
|               | SERPINC1  |
|               | SLC13A5   |
|               | ITIH1     |
|               | KNG1      |
|               | CYP27A1   |
|               | MGST1     |
|               | CYP2B6    |
|               | PBLD      |
|               | APOC2     |
|               | APOC3     |
|               | AHSG      |
|               | C9        |
|               | ALDH4A1   |
|               | CFB       |
|               | APOB      |
|               | ADH1B     |
|               | TF        |
|               | CYP3A4    |
|               | APOA1     |
|               | CYP2E1    |
|               | VNN1      |
|               | SEPP1     |
|               | SERPINA3  |
|               | APCS      |
|               | EPHX1     |
|               | CBS       |
|               | RBP4      |
|               | UGT2B4    |
| CP            |           |
| CYP1A2        |           |
| CPS1          |           |
| TTC39C        |           |
| CYP3A5        |           |
| Proliferation | RPL28     |
|               | RPL37A    |
|               | STAG3L2   |
|               | WAC       |
|               | CLIC1     |
|               | RPS3      |
|               | POM121C   |
|               | PIK3C2A   |
|               | STAG3L3   |
|               | YWHAB     |
|               | RPL11     |
|               | EEF2      |
|               | PTPN2     |
|               | RPL36A    |
|               | SERP1     |
|               | EFTUD2    |
|               | CNOT7     |
|               | STK25     |
|               | UXT       |
|               | RPL41     |
|               | RPS29     |
|               | TMBIM6    |
|               | MARCH6    |
|               | HDGF      |
|               | PAPOLA    |
|               | GNB2L1    |
|               | SYNCRIP   |
|               | ATP5L     |
|               | MRPL42    |
|               | FAU       |
| KHSRP         |           |
| SPINT1        |           |
| RPL4          |           |
| RBM17         |           |
| RPL14         |           |
| SMARCE1       |           |
| MORF4L2       |           |
| MRFAP1        |           |
| MRPS24        |           |
| UBE2N         |           |
| UBA52         |           |
| OST4          |           |
| TAPBP         |           |
| H2AFY         |           |
| RPS15A        |           |
| SLC25A6       |           |
| UPF3A         |           |
| RPL5          |           |
| SNW1          |           |
| TUBB2C        |           |
| Mesenchymal   | POSTN     |
|               | THBS2     |
|               | SYTL4     |
|               | NRP2      |
|               | INHBA     |
|               | NEURL     |
|               | COL1A1    |
|               | COL12A1   |
|               | OLFML2B   |
|               | SPARC     |
|               | COL10A1   |
|               | CDH11     |
|               | TAGLN     |
|               | BHLHE40   |
|               | ITGA11    |
|               | VCAN      |
|               | MYL9      |
|               | CALD1     |
|               | STON1     |
|               | GREM1     |
|               | LGALS1    |
|               | VIM       |
|               | TGFBI     |
|               | COMP      |
|               | HTRA3     |
|               | FAM127A   |
|               | COL11A1   |
|               | CCDC80    |
|               | EHD2      |
|               | OSBPL5    |
| COL5A1        |           |
| PALLD         |           |
| WIPF1         |           |
| IVNS1ABP      |           |
| SULF1         |           |
| TIMP2         |           |
| SH3PXD2B      |           |
| FSTL1         |           |
| C5AR1         |           |
| COL6A1        |           |
| PTK7          |           |
| PLOD2         |           |
| DNAJB5        |           |
| CDH13         |           |
| CRISPLD2      |           |
| PLK3          |           |
| COL1A2        |           |
| ROR2          |           |
| SERPINE1      |           |
| LSAMP         |           |
| Immune        | IGL@      |
|               | IGHA1     |
|               | PIK3IP1   |
|               | CORO1A    |
|               | IGJ       |
|               | ATP2A3    |
|               | ARHGDIB   |
|               | IGHM      |
|               | PTGDS     |
|               | HIST1H2AE |
|               | SMAP2     |
|               | PAPSS1    |
|               | ITGAX     |
|               | CD4       |
| IL23A         |           |
| ARHGAP9       |           |
| CCDC69        |           |
| HIST1H2BD     |           |
| CCR7          |           |
| CYR61         |           |
| NR4A1         |           |
| HIST1H4E      |           |
| TSC22D3       |           |
| TCF7          |           |

The Class Neighbors tool from GenePattern was used to determine based on a signal-to-noise distance function which genes were most closely correlated with a specific molecular class template and how significant the correlation was compared with random permutation versions of the phenotype (intersection of observed data with 1% significance level). The 174-gene classifier -composed by a maximum of 50 genes defining each class- was able to assign eCCA samples to one of the four molecular classes with a global precision of 86% in our discovery eCCA cohort.

**Supplementary Table 12. External validation of eCCA molecular classes in the ICGC cohort.**

| Sample | Anatomical location | Inferred eCCA molecular class | OS status | OS days | ERBB2 mutation |
|--------|---------------------|-------------------------------|-----------|---------|----------------|
| BD109  | iCCA                | Metabolic                     | 0         | 380     | Absent         |
| BD111  | iCCA                | Metabolic                     | 1         | 681     | Absent         |
| BD125  | iCCA                | Metabolic                     | 1         | 1017    | Absent         |
| BD137  | iCCA                | Metabolic                     | 0         | 1150    | Absent         |
| BD15   | iCCA                | Metabolic                     | 1         | 181     | Absent         |
| BD151  | iCCA                | Metabolic                     | 0         | 419     | Absent         |
| BD159  | iCCA                | Metabolic                     | 0         | 503     | Absent         |
| BD165  | iCCA                | Metabolic                     | 0         | 358     | Present        |
| BD167  | iCCA                | Metabolic                     | 0         | 134     | Absent         |
| BD168  | iCCA                | Metabolic                     | 0         | 220     | Absent         |
| BD19   | iCCA                | Metabolic                     | 0         | 2382    | Absent         |
| BD210  | iCCA                | Metabolic                     | 0         | 59      | Absent         |
| BD212  | iCCA                | Metabolic                     | 1         | 694     | Absent         |
| BD218  | iCCA                | Metabolic                     | 0         | 601     | Absent         |
| BD231  | iCCA                | Metabolic                     | 1         | 648     | Absent         |
| BD237  | iCCA                | Metabolic                     | 0         | 3610    | Absent         |
| BD24   | iCCA                | Metabolic                     | 0         | 2284    | Absent         |
| BD242  | iCCA                | Metabolic                     | 0         | 2127    | Absent         |
| BD244  | iCCA                | Metabolic                     | 1         | 976     | Absent         |
| BD27   | iCCA                | Metabolic                     | 1         | 1849    | Absent         |
| BD318  | iCCA                | Metabolic                     | NA        | NA      | NA             |
| BD36   | iCCA                | Metabolic                     | 0         | 2234    | Absent         |
| BD40   | iCCA                | Metabolic                     | 1         | 1791    | Absent         |
| BD42   | iCCA                | Metabolic                     | 0         | 3081    | Absent         |
| BD78   | iCCA                | Metabolic                     | 1         | 156     | Absent         |
| BD81   | iCCA                | Metabolic                     | 1         | 1905    | Absent         |
| BD95   | iCCA                | Metabolic                     | 0         | 2134    | Absent         |
| BD105  | iCCA                | Proliferation                 | 0         | 1981    | Absent         |
| BD114  | iCCA                | Proliferation                 | 1         | 181     | Present        |
| BD117  | iCCA                | Proliferation                 | 1         | 894     | Absent         |
| BD124  | iCCA                | Proliferation                 | 0         | 1266    | Absent         |
| BD132  | iCCA                | Proliferation                 | 1         | 445     | Absent         |
| BD134  | iCCA                | Proliferation                 | 1         | 90      | Absent         |
| BD141  | iCCA                | Proliferation                 | 0         | 1756    | Absent         |
| BD197  | iCCA                | Proliferation                 | 1         | 537     | Absent         |
| BD199  | iCCA                | Proliferation                 | 1         | 603     | Absent         |
| BD214  | iCCA                | Proliferation                 | 1         | 125     | Absent         |
| BD23   | iCCA                | Proliferation                 | 1         | 319     | Absent         |
| BD28   | iCCA                | Proliferation                 | 0         | 2204    | Absent         |
| BD29   | iCCA                | Proliferation                 | 1         | 53      | Absent         |
| BD308  | iCCA                | Proliferation                 | NA        | NA      | NA             |
| BD334  | iCCA                | Proliferation                 | NA        | NA      | NA             |
| BD46   | iCCA                | Proliferation                 | 1         | 1094    | Absent         |
| BD47   | iCCA                | Proliferation                 | 0         | 2914    | Absent         |
| BD57   | iCCA                | Proliferation                 | 0         | 2756    | Absent         |
| BD74   | iCCA                | Proliferation                 | 1         | 1627    | Absent         |
| BD8    | iCCA                | Proliferation                 | 0         | 2934    | Absent         |
| BD82   | iCCA                | Proliferation                 | 1         | 428     | Present        |
| BD84   | iCCA                | Proliferation                 | 0         | 1835    | Absent         |
| BD92   | iCCA                | Proliferation                 | 0         | 2172    | Absent         |
| BD104  | iCCA                | Mesenchymal                   | 1         | 168     | Absent         |
| BD118  | iCCA                | Mesenchymal                   | 1         | 851     | Absent         |
| BD129  | iCCA                | Mesenchymal                   | 1         | 386     | Absent         |
| BD135  | iCCA                | Mesenchymal                   | 0         | 1911    | Absent         |
| BD14   | iCCA                | Mesenchymal                   | 0         | 1624    | Absent         |
| BD143  | iCCA                | Mesenchymal                   | 0         | 162     | Absent         |
| BD147  | iCCA                | Mesenchymal                   | 0         | 83      | Absent         |
| BD148  | iCCA                | Mesenchymal                   | 0         | 264     | Absent         |
| BD149  | iCCA                | Mesenchymal                   | 0         | 403     | Absent         |

|       |      |              |    |      |         |
|-------|------|--------------|----|------|---------|
| BD152 | iCCA | Mesenchymal  | 0  | 767  | Absent  |
| BD153 | iCCA | Mesenchymal  | 0  | 624  | Absent  |
| BD154 | iCCA | Mesenchymal  | 0  | 135  | Absent  |
| BD157 | iCCA | Mesenchymal  | 1  | 472  | Absent  |
| BD169 | iCCA | Mesenchymal  | 0  | 146  | Absent  |
| BD18  | iCCA | Mesenchymal  | 1  | 299  | Absent  |
| BD200 | iCCA | Mesenchymal  | 0  | 2259 | Absent  |
| BD226 | iCCA | Mesenchymal  | 0  | 916  | Absent  |
| BD247 | iCCA | Mesenchymal  | 0  | 72   | Absent  |
| BD3   | iCCA | Mesenchymal  | 0  | 166  | Absent  |
| BD30  | iCCA | Mesenchymal  | 0  | 2608 | Absent  |
| BD31  | iCCA | Mesenchymal  | 1  | 882  | Absent  |
| BD310 | iCCA | Mesenchymal  | NA | NA   | NA      |
| BD312 | iCCA | Mesenchymal  | NA | NA   | NA      |
| BD313 | iCCA | Mesenchymal  | NA | NA   | NA      |
| BD45  | iCCA | Mesenchymal  | 0  | 1977 | Absent  |
| BD5   | iCCA | Mesenchymal  | 0  | 3111 | Absent  |
| BD54  | iCCA | Mesenchymal  | 1  | 646  | Absent  |
| BD56  | iCCA | Mesenchymal  | 1  | 1380 | Absent  |
| BD80  | iCCA | Mesenchymal  | 1  | 181  | Absent  |
| BD97  | iCCA | Mesenchymal  | NA | NA   | NA      |
| BD138 | iCCA | Immune       | 1  | 4    | Absent  |
| BD140 | iCCA | Immune       | 1  | 264  | Absent  |
| BD146 | iCCA | Immune       | 0  | 670  | Absent  |
| BD150 | iCCA | Immune       | 0  | 582  | Absent  |
| BD195 | iCCA | Immune       | NA | NA   | NA      |
| BD219 | iCCA | Immune       | 0  | 1349 | Absent  |
| BD224 | iCCA | Immune       | 0  | 818  | Absent  |
| BD239 | iCCA | Immune       | 1  | 1128 | Absent  |
| BD6   | iCCA | Immune       | 1  | 784  | Absent  |
| BD87  | iCCA | Immune       | 0  | 762  | Present |
| BD10  | iCCA | Unclassified | 1  | 1153 | Absent  |
| BD101 | iCCA | Unclassified | 1  | 1829 | Absent  |
| BD115 | iCCA | Unclassified | 0  | 1604 | Absent  |
| BD12  | iCCA | Unclassified | 1  | 532  | Absent  |
| BD121 | iCCA | Unclassified | 0  | 1335 | Absent  |
| BD142 | iCCA | Unclassified | 0  | 1068 | Absent  |
| BD196 | iCCA | Unclassified | NA | NA   | NA      |
| BD201 | iCCA | Unclassified | 1  | 1424 | Absent  |
| BD21  | iCCA | Unclassified | 1  | 452  | Absent  |
| BD211 | iCCA | Unclassified | 1  | 341  | Absent  |
| BD213 | iCCA | Unclassified | 1  | 208  | Absent  |
| BD220 | iCCA | Unclassified | 0  | 458  | Absent  |
| BD221 | iCCA | Unclassified | 0  | 1013 | Absent  |
| BD222 | iCCA | Unclassified | 0  | 1016 | Absent  |
| BD223 | iCCA | Unclassified | 1  | 722  | Absent  |
| BD227 | iCCA | Unclassified | 1  | 277  | Absent  |
| BD229 | iCCA | Unclassified | 1  | 144  | Absent  |
| BD230 | iCCA | Unclassified | 1  | 486  | Absent  |
| BD232 | iCCA | Unclassified | 1  | 1428 | Absent  |
| BD233 | iCCA | Unclassified | 1  | 196  | Absent  |
| BD234 | iCCA | Unclassified | 1  | 218  | Absent  |
| BD243 | iCCA | Unclassified | 1  | 334  | Absent  |
| BD25  | iCCA | Unclassified | 1  | 402  | Absent  |
| BD32  | iCCA | Unclassified | 1  | 749  | Absent  |
| BD33  | iCCA | Unclassified | 1  | 574  | Absent  |
| BD38  | iCCA | Unclassified | 1  | 712  | Absent  |
| BD41  | iCCA | Unclassified | 1  | 654  | Absent  |
| BD72  | iCCA | Unclassified | 1  | 474  | Present |
| BD75  | iCCA | Unclassified | 0  | 1825 | Absent  |
| BD79  | iCCA | Unclassified | 0  | 1722 | Absent  |
| BD86  | iCCA | Unclassified | 1  | 174  | Absent  |
| BD88  | iCCA | Unclassified | 1  | 175  | Absent  |

|       |      |               |    |      |         |
|-------|------|---------------|----|------|---------|
| BD11  | pCCA | Metabolic     | 1  | 583  | Absent  |
| BD112 | pCCA | Proliferation | 0  | 1254 | Absent  |
| BD49  | pCCA | Proliferation | 0  | 2879 | Absent  |
| BD53  | pCCA | Proliferation | 0  | 1334 | Absent  |
| BD155 | pCCA | Mesenchymal   | 0  | 210  | Absent  |
| BD163 | pCCA | Mesenchymal   | 1  | 267  | Absent  |
| BD52  | pCCA | Mesenchymal   | 0  | 2776 | Absent  |
| BD9   | pCCA | Mesenchymal   | 0  | 1037 | Absent  |
| BD91  | pCCA | Mesenchymal   | 1  | 90   | Absent  |
| BD162 | pCCA | Unclassified  | 0  | 314  | Absent  |
| BD166 | pCCA | Unclassified  | 0  | 328  | Absent  |
| BD241 | pCCA | Unclassified  | 0  | 2118 | Absent  |
| BD34  | pCCA | Unclassified  | 0  | 355  | Absent  |
| BD306 | dCCA | Metabolic     | NA | NA   | NA      |
| BD13  | dCCA | Proliferation | 0  | 2882 | Present |
| BD158 | dCCA | Proliferation | 0  | 477  | Absent  |
| BD16  | dCCA | Proliferation | 1  | 489  | Absent  |
| BD207 | dCCA | Proliferation | 0  | 68   | Present |
| BD305 | dCCA | Proliferation | NA | NA   | NA      |
| BD314 | dCCA | Proliferation | NA | NA   | NA      |
| BD315 | dCCA | Proliferation | NA | NA   | NA      |
| BD316 | dCCA | Proliferation | NA | NA   | NA      |
| BD322 | dCCA | Proliferation | NA | NA   | NA      |
| BD333 | dCCA | Proliferation | NA | NA   | NA      |
| BD35  | dCCA | Proliferation | 1  | 672  | Absent  |
| BD4   | dCCA | Proliferation | 0  | 2547 | Absent  |
| BD48  | dCCA | Proliferation | 0  | 2920 | Absent  |
| BD55  | dCCA | Proliferation | 0  | 2725 | Absent  |
| BD7   | dCCA | Proliferation | 0  | 3126 | Absent  |
| BD128 | dCCA | Mesenchymal   | 0  | 1436 | Absent  |
| BD160 | dCCA | Mesenchymal   | 1  | 34   | Absent  |
| BD319 | dCCA | Mesenchymal   | NA | NA   | NA      |
| BD122 | dCCA | Immune        | 0  | 887  | Absent  |
| BD161 | dCCA | Immune        | 0  | 388  | Absent  |
| BD317 | dCCA | Immune        | NA | NA   | NA      |
| BD205 | dCCA | Unclassified  | 0  | 83   | Absent  |
| BD321 | dCCA | Unclassified  | NA | NA   | NA      |
| BD336 | dCCA | Unclassified  | NA | NA   | NA      |
| BD37  | dCCA | Unclassified  | 1  | 389  | Absent  |
| BD170 | GBC  | Unclassified  | 1  | 804  | Absent  |
| BD171 | GBC  | Mesenchymal   | 1  | 297  | Absent  |
| BD172 | GBC  | Mesenchymal   | 1  | 792  | Absent  |
| BD173 | GBC  | Unclassified  | 1  | 384  | Absent  |
| BD175 | GBC  | Unclassified  | 0  | 3365 | Absent  |
| BD176 | GBC  | Proliferation | 1  | 435  | Absent  |
| BD179 | GBC  | Unclassified  | 1  | 92   | Absent  |
| BD180 | GBC  | Proliferation | 1  | 823  | Present |
| BD182 | GBC  | Unclassified  | 0  | 204  | Absent  |
| BD184 | GBC  | Proliferation | 0  | 2029 | Absent  |
| BD186 | GBC  | Mesenchymal   | 0  | 1580 | Absent  |
| BD187 | GBC  | Unclassified  | 0  | 1432 | Absent  |
| BD189 | GBC  | Unclassified  | 1  | 704  | Absent  |
| BD190 | GBC  | Unclassified  | 0  | 157  | Absent  |
| BD191 | GBC  | Unclassified  | 1  | 328  | Absent  |
| BD192 | GBC  | Unclassified  | 0  | 700  | Absent  |
| BD194 | GBC  | Mesenchymal   | 0  | 79   | Absent  |
| BD202 | GBC  | Unclassified  | 0  | 112  | Absent  |
| BD206 | GBC  | Mesenchymal   | 0  | 99   | Absent  |
| BD335 | GBC  | Proliferation | NA | NA   | NA      |

Fastq files of RNAseq from 182 samples of biliary tract cancer (iCCA=122, pCCA=14, dCCA=26, GBC=20) were downloaded from the European Genome-phenome Archive. One sample (BD20) was not successfully normalized. Prediction in the external cohort of the eCCA classifier was performed using the Nearest Template Prediction method, as implemented in the specific module of GenePattern. We correlated the proposed molecular classes of eCCA (Metabolic, Proliferation, Mesenchymal and Immune) with clinical variables and non-silent somatic mutations analyzed by whole-exome sequencing and available at the International Cancer Genome Consortium (ICGC) Data portal. OS: Overall survival.

**Supplementary Table 13. Ongoing clinical trials assessing targeted therapies in eCCA.**

| NCT Number  | Experimental drug          | Target                      | Trial     | Line   | Biomarker (% in eCCA)              |
|-------------|----------------------------|-----------------------------|-----------|--------|------------------------------------|
| NCT02989857 | AG-120                     | IDH1                        | Phase 3   | Second | IDH1 mut (2.0%)                    |
| NCT03656536 | Pemigatinib                | FGFR1/2/3                   | Phase 3   | First  | FGFR2 rearrangement (0%)*          |
| NCT03875235 | Durvalumab                 | PD-L1                       | Phase 3   | First  |                                    |
| NCT03478488 | KN035                      | PD-L1                       | Phase 3   | First  |                                    |
| NCT03093870 | Varlitinib                 | pan-HER                     | Phase 2/3 | Second | <i>Proliferation class (22.5%)</i> |
| NCT03873532 | Surufatinib                | Multi-TKI                   | Phase 2/3 | Second |                                    |
| NCT02162914 | Regorafenib                | Multi-TKI                   | Phase 2   | Second |                                    |
| NCT02232633 | BB1503                     | Stemness kinase inhibitor   | Phase 2   | Second |                                    |
| NCT02520141 | Ramucirumab                | VEGFR2                      | Phase 2   | Second |                                    |
| NCT02631590 | Copanlisib                 | PI3K                        | Phase 2   | First  |                                    |
| NCT02982720 | Pembrolizumab + Sylatron   | PD-1                        | Phase 2   | Second | <i>Immune class (11.5%)</i>        |
| NCT03111732 | Pembrolizumab              | PD-1                        | Phase 2   | First  | <i>Immune class (11.5%)</i>        |
| NCT03201458 | Atezolizumab + Cobimetinib | PD-L1/MEK                   | Phase 2   | Second |                                    |
| NCT03250273 | Entinostat                 | HDAC/PD-1                   | Phase 2   | Second |                                    |
| NCT03377179 | Yeliva                     | SK2 (Lipid metabolism)      | Phase 2   | Second | <i>Metabolic class (18.7%)</i>     |
| NCT03473574 | Durvalumab + Tremelimumab  | PD-L1/CTLA4                 | Phase 2   | First  |                                    |
| NCT03486678 | SHR-1210                   | PD-1                        | Phase 2   | First  | <i>Immune class (11.5%)</i>        |
| NCT03613168 | Trastuzumab                | ERBB2                       | Phase 2   | First  | ERBB2 overexpression/amp (3.9%)    |
| NCT03833661 | M7824                      | PD-L1/TGFβ                  | Phase 2   | Second | <i>Mesenchymal class (47.3%)</i>   |
| NCT03878095 | Olaparib + Ceralasertib    | PARP/ATR                    | Phase 2   | Second | IDH1/2 mut (4.7%)                  |
| NCT03796429 | Toripalimab                | PD-1                        | Phase 2   | First  | <i>Immune class (11.5%)</i>        |
| NCT03144856 | Apatinib                   | Multi-TKI                   | Phase 2   | Second |                                    |
| NCT02579616 | Lenvatinib                 | Multi-TKI                   | Phase 2   | Second |                                    |
| NCT03231176 | Varlitinib                 | pan-HER                     | Phase 2   | Second | Proliferation class (22.5%)        |
| NCT03639935 | Rucaparib + Nivolumab      | PARP/PD-1                   | Phase 2   | Second |                                    |
| NCT03110328 | Pembrolizumab              | PD-1                        | Phase 2   | Second | <i>Immune class (11.5%)</i>        |
| NCT02829918 | Nivolumab                  | PD-1                        | Phase 2   | Second | <i>Immune class (11.5%)</i>        |
| NCT03110484 | Erlotinib + Pemetrexed     | EGFR                        | Phase 2   | Second |                                    |
| NCT02711553 | Ramucirumab / Meritinib    | VEGFR2/TKI                  | Phase 2   | First  |                                    |
| NCT03260712 | Pembrolizumab              | PD-1                        | Phase 2   | Second | <i>Immune class (11.5%)</i>        |
| NCT02703714 | Pembrolizumab + GM-CSF     | PD-1                        | Phase 2   | Second | <i>Immune class (11.5%)</i>        |
| NCT03046862 | Durvalumab + Tremelimumab  | PD-L1/CTLA4                 | Phase 2   | First  |                                    |
| NCT03101566 | Nivolumab + Ipilimumab     | PD-1/CTLA4                  | Phase 2   | First  |                                    |
| NCT02115542 | Regorafenib                | Multi-TKI                   | Phase 2   | Second |                                    |
| NCT02151084 | Selumetinib                | MEK                         | Phase 2   | First  |                                    |
| NCT02265341 | Ponatinib                  | Multi-TKI                   | Phase 2   | Second | FGFR alterations (2%)              |
| NCT03427242 | Apatinib                   | Multi-TKI                   | Phase 2   | Second |                                    |
| NCT03092895 | SHR-1210 + Apatinib        | PD-1/Multi-TKI              | Phase 2   | Second |                                    |
| NCT02128282 | CX-4945                    | CK2 (Cell cycle/DNA repair) | Phase 1/2 | First  | <i>Proliferation class (22.5%)</i> |
| NCT03785873 | Nivolumab + Nal-Irinotecan | PD-1                        | Phase 1/2 | Second |                                    |
| NCT02992340 | Varlitinib                 | pan-HER                     | Phase 1/2 | Second | <i>Proliferation class (22.5%)</i> |
| NCT02773459 | MEK162                     | MEK                         | Phase 1/2 | Second |                                    |
| NCT02386397 | Regorafenib                | Multi-TKI                   | Phase 1/2 | First  |                                    |
| NCT01828034 | MEK162                     | MEK                         | Phase 1/2 | First  |                                    |
| NCT03257761 | Guadecitabine + Durvalumab | DNMT/PD-L1                  | Phase 1   | Second |                                    |
| NCT03267940 | PEGPH20 + Atezplizumab     | Hyaluronidase/PD-L1         | Phase 1   | First  | <i>Mesenchymal class (47.3%)</i>   |

Data of ongoing clinical trials was obtained in March 2019 from the ClinicalTrials.gov database. Keyword searches for “cholangiocarcinoma” and “biliary tract cancer” were used to identify active clinical trials (recruiting, not yet recruiting, active, not recruiting, enrolling by invitation) assessing targeted therapies for advanced eCCA. Basket trials assessing solid tumors other than hepato-biliary-pancreatic tumors were excluded. Biomarkers in italic are suggested based on the present study. \*FGFR2 rearrangements exclusively detected in iCCA according to literature.

**Supplementary Table 14. Expression factor comprising 149 genes identified by NMF in eCCA.**

| Gene         |              |          |
|--------------|--------------|----------|
| HOMER2       | ST6GAL1      | ADH1B    |
| VIL1         | APCS         | CYP2B6   |
| GABRB3       | ITIH4        | CFH      |
| CMBL         | CYP1A2       | PCK1     |
| FAM171A1     | MAG1         | ASS1     |
| HPX          | LOC100291873 | C3       |
| TTC39C       | UQCRFS1      | FABP5    |
| HMGN3        | GSTM1        | CYP3A5   |
| PRDX2        | ITIH3        | UGT2B7   |
| SPINK1       | PBLD         | MT1P3    |
| SSR2         | UGT2B4       | EPHX1    |
| KRT18        | SLC35C1      | APOB     |
| GGH          | SEPP1        | CYP2B6   |
| TFR2         | HPS3         | PLG      |
| AHSG         | CYP2A6       | SORD     |
| GYG2         | GOT1         | FGFRL1   |
| SAA1         | AMY1A        | AGT      |
| FMO3         | MTHFD1       | RBP4     |
| HNF4G        | FGG          | AKR1C1   |
| GATM         | CFB          | HAMP     |
| ARG1         | AQP9         | SLC13A5  |
| CYP2D7P1     | ADH1A        | APOC3    |
| PLGLB2       | AZGP1        | CBS      |
| CYP2C8       | A2M          | CPS1     |
| G6PC         | SLC22A1      | CXADR    |
| CTAGE5       | SERPINA6     | KNG1     |
| ATF5         | DHCR24       | DYNC1I2  |
| HPD          | CP           | APOA1    |
| CYP2C18      | GC           | FABP1    |
| RNF5         | UGT1A10      | CYP2E1   |
| SLC47A1      | ACADVL       | CRP      |
| TMEM176A     | APOC2        | ORM1     |
| DDTL         | CLU          | CYP4A11  |
| LOC100291980 | MT1F         | FGB      |
| PXMP2        | CDH2         | TF       |
| SEMA6A       | AKR1C2       | AQP3     |
| PTPRF        | ITIH1        | SERPINA3 |
| PRAP1        | RPLP0        | SCD      |
| UGT2B10      | CYP4A11      | APOC1    |
| TTR          | CYP2A6       | AKR1C1   |
| SERPINC1     | ALAS1        | ALB      |
| APOH         | SEBOX        | SERPINA1 |
| ALDH4A1      | CYP3A7       | ITIH2    |
| AKR1C3       | C1RL         | HP       |
| C9           | MT1M         | MT1G     |
| SLC19A3      | VTN          | APOA2    |
| OCLN         | CD96         | ADH1A    |
| AFF4         | MT1JP        | DCAF6    |
| C19orf77     | SC4MOL       | FGA      |
|              | CYP3A4       | ORM1     |

The top 1696 most variable genes in our dataset identified with the Preprocess Dataset module in Genepattern underwent Non-negative matrix factorization (NMF) in order to perform virtual microdissection of gene expression data. A factor composed by 149 genes was identified and further characterized as explained in Supplementary Table 12.



## Supplementary Table 15. Identification of a liver-related expression factor in eCCA.

| Gene Set Name              | Genes in Gene Set | Description                                                                | Genes in Overlap | p-value   | FDR q-value |
|----------------------------|-------------------|----------------------------------------------------------------------------|------------------|-----------|-------------|
| HSIAO_LIVER_SPECIFIC_GENES | 248               | Liver selective genes                                                      | 66               | 5.71E-117 | 1.29E-112   |
| MODULE_23                  | 562               | Liver genes - metabolism and xenobiotics.                                  | 65               | 2.55E-89  | 2.88E-85    |
| MODULE_55                  | 830               | Genes in the cancer module 55.                                             | 66               | 1.05E-79  | 7.94E-76    |
| MODULE_88                  | 833               | Heart, liver, kidney and pancreas metabolic and xenobiotic response genes. | 64               | 4.77E-76  | 2.70E-72    |
| MODULE_24                  | 452               | Fetal liver genes - metabolism and xenobiotics.                            | 55               | 8.49E-76  | 3.84E-72    |
| GNF2_HPX                   | 135               | Neighborhood of HPX                                                        | 38               | 1.12E-66  | 4.23E-63    |
| GNF2_HPNI                  | 134               | Neighborhood of HPNI                                                       | 36               | 2.92E-62  | 9.43E-59    |
| GNF2_LCAT                  | 124               | Neighborhood of LCAT                                                       | 33               | 7.52E-57  | 2.12E-53    |
| CAR_HPNI                   | 73                | Neighborhood of HPNI                                                       | 29               | 5.78E-56  | 1.45E-52    |
| GNF2_TST                   | 104               | Neighborhood of TST                                                        | 30               | 7.29E-53  | 1.65E-49    |

149 genes identified with Non-negative matrix factorization (NMF) were interrogated using curated gene sets from MSigDB collections. According to significant overlaps of selected genes, a liver-related expression factor was proposed.

### **Supplementary References:**

- [1] Reich M, Liefeld T, Gould J, Lerner J, Tamayo P, Mesirov JP. GenePattern 2.0. *Nat Genet* 2006;38:500–1.
- [2] Bailey P, Chang DK, Nones K, Johns AL, Patch A-M, Gingras M-C, et al. Genomic analyses identify molecular subtypes of pancreatic cancer. *Nature* 2016;531:47–52.
- [3] Farshidfar F, Zheng S, Gingras M-C, Newton Y, Shih J, Robertson AG, et al. Integrative Genomic Analysis of Cholangiocarcinoma Identifies Distinct IDH - Mutant Molecular Profiles. *Cell Rep* 2017;18:2780–94.
- [4] Moffitt R a, Marayati R, Flate EL, Volmar KE, Loeza SGH, Hoadley K a, et al. Virtual microdissection identifies distinct tumor- and stroma-specific subtypes of pancreatic ductal adenocarcinoma. *Nat Genet* 2015;47:1168–78.
- [5] Liberzon A, Birger C, Thorvaldsdóttir H, Ghandi M, Mesirov JP, Tamayo P. The Molecular Signatures Database Hallmark Gene Set Collection. *Cell Syst* 2015;1:417–25.
- [6] Yoshihara K, Shahmoradgoli M, Martínez E, Vegesna R, Kim H, Torres-Garcia W, et al. Inferring tumour purity and stromal and immune cell admixture from expression data. *Nat Commun* 2013;4:2612.
- [7] Charoentong P, Finotello F, Angelova M, Mayer C, Efremova M, Rieder D, et al. Pan-cancer Immunogenomic Analyses Reveal Genotype-Immunophenotype

- Relationships and Predictors of Response to Checkpoint Blockade. *CellReports* 2017;18:248–62.
- [8] Jiang P, Gu S, Pan D, Fu J, Sahu A, Hu X, et al. Signatures of T cell dysfunction and exclusion predict cancer immunotherapy response. *Nat Med* 2018;24:1550–8.
- [9] Sia D, Hoshida Y, Villanueva A, Roayaie S, Ferrer J, Tabak B, et al. Integrative molecular analysis of intrahepatic cholangiocarcinoma reveals 2 classes that have different outcomes. *Gastroenterology* 2013;144:829–40.
- [10] Andersen JB, Spee B, Blechacz BR, Avital I, Komuta M, Barbour A, et al. Genomic and genetic characterization of cholangiocarcinoma identifies therapeutic targets for tyrosine kinase inhibitors. *Gastroenterology* 2012;142:1021–31.
- [11] Sulpice L, Rayar M, Desille M, Turlin B, Fautrel A, Boucher E, et al. Molecular profiling of stroma identifies osteopontin as an independent predictor of poor prognosis in intrahepatic cholangiocarcinoma. *Hepatology* 2013;58:1992–2000.
- [12] Chiang DY, Villanueva A, Hoshida Y, Peix J, Newell P, Minguez B, et al. Focal gains of VEGFA and molecular classification of hepatocellular carcinoma. *Cancer Res* 2008;68:6779–88.
- [13] Hoshida Y, Nijman SMB, Kobayashi M, Chan JA, Brunet J-P, Chiang DY, et al. Integrative transcriptome analysis reveals common molecular subclasses of human hepatocellular carcinoma. *Cancer Res* 2009;69:7385–92.
- [14] Sia D, Jiao Y, Martinez-Quetglas I, Kuchuk O, Villacorta-Martin C, Castro De Moura

- M, et al. Identification of an Immune-specific Class of Hepatocellular Carcinoma, Based on Molecular Features. *Gastroenterology* 2017;153:812–26.
- [15] Collisson EA, Sadanandam A, Olson P, Gibb WJ, Truitt M, Gu S, et al. Subtypes of pancreatic ductal adenocarcinoma and their differing responses to therapy. *Nat Med* 2011;17:500–3.
- [16] Golub TR, Slonim DK, Tamayo P, Huard C, Gaasenbeek M, Mesirov JP, et al. Molecular Classification of Cancer: Class Discovery and Class Prediction by Gene Expression Monitoring. *Science* 1999;286:531–7.
- [17] Tamborero D, Rubio-Perez C, Deu-Pons J, Schroeder MP, Vivancos A, Rovira A, et al. Cancer Genome Interpreter annotates the biological and clinical relevance of tumor alterations. *Genome Med* 2018;10:1–8.
- [18] Vaughn CP, Robles J, Swensen JJ, Miller CE, Lyon E, Mao R, et al. Clinical analysis of PMS2 : mutation detection and avoidance of pseudogenes. *Hum Mutat* 2010;31:588–93.
- [19] Boeva V, Popova T, Lienard M, Toffoli S, Kamal M, Le Tourneau C, et al. Multi-factor data normalization enables the detection of copy number aberrations in amplicon sequencing data. *Bioinformatics* 2014;30:3443–50.
- [20] Frampton GM, Fichtenholtz A, Otto GA, Wang K, Downing SR, He J, et al. Development and validation of a clinical cancer genomic profiling test based on massively parallel DNA sequencing. *Nat Biotechnol* 2013;31:1023–31.

- [21] Wolff a. C, Hammond MEH, Hicks DG, Dowsett M, McShane LM, Allison KH, et al. Recommendations for Human Epidermal Growth Factor Receptor 2 Testing in Breast Cancer: American Society of Clinical Oncology/College of American Pathologists Clinical Practice Guideline Update. *J Clin Oncol* 2013;31:3997–4013.
- [22] D’Incecco A, Andreozzi M, Ludovini V, Rossi E, Capodanno A, Landi L, et al. PD-1 and PD-L1 expression in molecularly selected non-small-cell lung cancer patients. *Br J Cancer* 2015;112:95–102.
- [23] Ueno M, Chung HC, Nagrial A, Marabelle A, Kelley RK, Xu L, et al. Pembrolizumab for advanced biliary adenocarcinoma: Results from the multicohort, phase 2 KEYNOTE-158 study. *Ann Oncol* 2018;29:(suppl\_8): viii205-viii270.
- [24] Chuaysri C, Thuwajit P, Paupairoj A, Chau-In S, Suthiphongchai T, Thuwajit C. Alpha-smooth muscle actin-positive fibroblasts promote biliary cell proliferation and correlate with poor survival in cholangiocarcinoma. *Oncol Rep* 2009;21:957–69.
- [25] Hampel H, Frankel WL, Martin E, Arnold M, Khanduja K, Kuebler P, et al. Screening for the Lynch Syndrome (Hereditary Nonpolyposis Colorectal Cancer). *N Engl J Med* 2005;352:1851–60.
- [26] Soliman NA, Yussif SM. Ki-67 as a prognostic marker according to breast cancer molecular subtype. *Cancer Biol Med* 2016;13:496–504.
- [27] Robinson MD, McCarthy DJ, Smyth GK. edgeR: A Bioconductor package for differential expression analysis of digital gene expression data. *Bioinformatics* 2009;26:139–40.

- [28] Chaisaingmongkol J, Budhu A, Dang H, Rabibhadana S, Pupacdi B, Kwon SM, et al. Common Molecular Subtypes Among Asian Hepatocellular Carcinoma and Cholangiocarcinoma. *Cancer Cell* 2017;32:57-70.e3.
- [29] Chong J, Soufan O, Li C, Caraus I, Li S, Bourque G, et al. MetaboAnalyst 4.0: Towards more transparent and integrative metabolomics analysis. *Nucleic Acids Res* 2018;46:W486–94.
- [30] Villanueva A, Portela A, Sayols S, Battiston C, Hoshida Y, Méndez-González J, et al. DNA methylation-based prognosis and epidrivers in hepatocellular carcinoma. *Hepatology* 2015;61:1945–56.
- [31] Ally A, Balasundaram M, Carlsen R, Chuah E, Clarke A, Dhalla N, et al. Comprehensive and Integrative Genomic Characterization of Hepatocellular Carcinoma. *Cell* 2017;169:1327-1341.e23.
- [32] Raphael B, Hruban R, Aguirre A, Moffitt R, Yeh J, Stewart C, et al. Integrated Genomic Characterization of Pancreatic Ductal Adenocarcinoma. *Cancer Cell* 2017;32:185–203.
- [33] Li H, Ning S, Ghandi M, Kryukov G V., Gopal S, Deik A, et al. The landscape of cancer cell line metabolism. *Nat Med* 2019;25:850–60.
- [34] Nakamura H, Arai Y, Totoki Y, Shirota T, Elzawahry A, Kato M, et al. Genomic spectra of biliary tract cancer. *Nat Genet* 2015;47:1003–10.
- [35] Jusakul A, Cutcutache I, Yong CH, Lim JQ, Huang MN, Padmanabhan N, et al.

Whole-Genome and Epigenomic Landscapes of Etiologically Distinct Subtypes of Cholangiocarcinoma. *Cancer Discov* 2017;7:1–20.

[36] Sia D, Losic B, Moeini A, Cabellos L, Hao K, Reville K, et al. Massive parallel sequencing uncovers actionable FGFR2–PPHLN1 fusion and ARAF mutations in intrahepatic cholangiocarcinoma. *Nat Commun* 2015;6:6087.

[37] Lee H, Wang K, Johnson A, Jones DM, Ali SM, Elvin J a, et al. Comprehensive genomic profiling of extrahepatic cholangiocarcinoma reveals a long tail of therapeutic targets. *J Clin Pathol* 2016;69:403–8.

[38] Subramanian A, Narayan R, Corsello SM, Peck DD, Natoli TE, Lu X, et al. A Next Generation Connectivity Map: L1000 Platform and the First 1,000,000 Profiles. *Cell* 2017;171:1437-1452.e17.
